# Supplementary material
Source: PubMed Central journal article supplement (PMC3358632)
Supplement: NIHMS371691-supplement-01.pdf [file NIHMS371691-supplement-01.pdf]

**Table S1. List of hit genes and the NMJ phenotype observed during RNAi knock down.**

| VDR line ID | Flybase ID  | Gene name  | Human gene name <sup>1</sup> | Synaptic apposition | Synaptic overgrowth | Synaptic undergrowth | Synaptic retractions | Axonal transport | Other |
|-------------|-------------|------------|------------------------------|---------------------|---------------------|----------------------|----------------------|------------------|-------|
| 103632      | FBgn0027084 | Aats-lys   | KARS                         | x                   |                     |                      |                      |                  | x     |
| 108631      | FBgn0033246 | ACC        | ACACA                        |                     |                     |                      | x                    |                  |       |
| 103703      | FBgn0010379 | Akt1       | AKT3                         |                     |                     |                      | x                    | x                | x     |
| 104489      | FBgn0260972 | alc        | PRKAB1                       |                     | x                   |                      |                      |                  |       |
| 110417      | FBgn0250789 | alpha-Spec | SPTAN1                       |                     |                     |                      | x                    | x                |       |
| 25387       | FBgn0250789 | alpha-Spec | SPTAN1                       |                     |                     |                      | x                    | x                |       |
| 110725      | FBgn0043012 | AP-2sigma  | AP2S1                        | x                   |                     |                      |                      |                  | x     |
| 103390      | FBgn0024832 | AP-50      | AP2M1                        |                     |                     |                      |                      |                  | x     |
| 16133       | FBgn0260945 | Atg1       | ULK2                         |                     |                     | x                    |                      |                  |       |
| 108409      | FBgn0013751 | Awh        | LHX8                         | x                   |                     |                      |                      |                  |       |
| 104879      | FBgn0039654 | Brd8       | BRD8                         |                     |                     |                      | x                    |                  |       |
| 107748      | FBgn0259246 | brp        |                              |                     |                     |                      |                      |                  | x     |
| 107748      | FBgn0259246 | brp        |                              |                     |                     |                      |                      |                  | x     |
| 104422      | FBgn0259246 | brp        |                              |                     |                     |                      |                      |                  | x     |
| 21135       | FBgn0259246 | brp        |                              |                     |                     |                      |                      |                  | x     |
| 110277      | FBgn0005592 | btl        | FGFR2                        |                     |                     | x                    |                      |                  | x     |
| 101755      | FBgn0011241 | cbx        | AKTIP                        |                     |                     |                      | x                    |                  |       |
| 100575      | FBgn0041342 | Cct1       | PCYT1A                       | x                   |                     |                      | x                    |                  |       |
| 110727      | FBgn0011573 | Cdc37      | CDC37                        |                     |                     |                      |                      | x                |       |
| 108635      | FBgn0034611 | CG10069    | SLC37A2                      |                     |                     |                      |                      |                  | x     |
| 101460      | FBgn0039116 | CG10375    | DNAJC8                       | x                   |                     |                      |                      |                  |       |
| 109610      | FBgn0037543 | CG10903    | WBSCR22                      | x                   |                     | x                    |                      | x                |       |
| 106921      | FBgn0033259 | CG11210    | TMEM63A                      |                     | x                   |                      |                      |                  |       |
| 103941      | FBgn0035400 | CG11537    | HIAT1                        |                     |                     |                      | x                    |                  |       |
| 100452      | FBgn0039271 | CG11839    | ZNF830                       |                     |                     | x                    | x                    | x                |       |
| 108565      | FBgn0027903 | CG12018    | POLD2                        |                     |                     | x                    |                      |                  |       |
| 110737      | FBgn0030037 | CG12125    | FAM73B                       | x                   |                     |                      | x                    | x                |       |
| 103372      | FBgn0037377 | CG1218     | C4orf27                      |                     | x                   |                      |                      |                  |       |
| 107421      | FBgn0036514 | CG12301    | UTP14A                       | x                   |                     | x                    | x                    |                  |       |
| 105625      | FBgn0033661 | CG13185    | MDN1                         |                     |                     | x                    | x                    |                  | x     |
| 104096      | FBgn0031062 | CG14230    | NOL8                         |                     |                     |                      | x                    | x                |       |
| 108616      | FBgn0039640 | CG14516    | ANPEP                        |                     |                     | x                    |                      | x                |       |
| 107076      | FBgn0031186 | CG14614    | DCAF7                        | x                   |                     |                      | x                    |                  |       |
| 110560      | FBgn0030336 | CG1578     | ATPBD4                       |                     |                     | x                    |                      |                  |       |
| 103729      | FBgn0029820 | CG16721    | TCP11L1                      | x                   |                     |                      |                      |                  |       |
| 105763      | FBgn0035423 | CG17737    | EIF1                         | x                   |                     |                      | x                    |                  |       |
| 101464      | FBgn0029995 | CG2256     | EFCAB1                       | x                   |                     |                      |                      |                  | x     |
| 108996      | FBgn0030000 | CG2260     | WDR46                        |                     |                     | x                    | x                    |                  |       |
| 102543      | FBgn0037534 | CG2781     | ELOVL7                       |                     |                     | x                    |                      |                  |       |
| 110091      | FBgn0031266 | CG2807     | SF3B1                        |                     |                     | x                    | x                    |                  |       |
| 103911      | FBgn0029672 | CG2875     | NOC4L                        |                     |                     | x                    |                      |                  |       |
| 110612      | FBgn0261383 | CG3125     | INTS6                        | x                   |                     |                      | x                    |                  |       |
| 108921      | FBgn0052262 | CG32262    | MPV17L2                      |                     | x                   |                      |                      |                  |       |
| 101350      | FBgn0038271 | CG3731     | PMPCB                        |                     |                     |                      | x                    | x                | x     |
| 110227      | FBgn0032216 | CG5384     | USP14                        |                     |                     | x                    | x                    |                  |       |
| 110620      | FBgn0034368 | CG5482     | FKBP8                        |                     |                     | x                    |                      |                  |       |
| 106099      | FBgn0032444 | CG5525     | CCT4                         | x                   |                     |                      |                      |                  |       |
| 109894      | FBgn0036030 | CG6767     | PRPS2                        |                     | x                   |                      | x                    |                  |       |
| 108615      | FBgn0030086 | CG7033     | CCT2                         | x                   |                     | x                    |                      |                  |       |

|        |             |              |          |   |   |   |   |   |
|--------|-------------|--------------|----------|---|---|---|---|---|
| 103905 | FBgn0033342 | CG8258       | CCT8     | x |   | x |   |   |
| 108620 | FBgn0021760 | chb          | CLASPI   |   |   |   | x |   |
| 103383 | FBgn0000319 | Chc          | CLTC     |   |   |   | x | x |
| 23666  | FBgn0000319 | Chc          | CLTC     |   |   |   |   | x |
| 24789  | FBgn0000319 | Chc          | CLTC     |   |   |   |   | x |
| 101458 | FBgn0000318 | cl           | TXNDC17  |   | x |   |   |   |
| 101516 | FBgn0027055 | CSN3         | COPS3    |   |   | x |   |   |
| 107010 | FBgn0032378 | CycY         | CCNY     |   | x |   |   | x |
| 104183 | FBgn0010220 | Dbp45A       | DDX49    |   |   |   | x |   |
| 101340 | FBgn0030276 | Dlic         | DYNC1LI2 |   |   | x | x | x |
| 106308 | FBgn0068023 | Dyak\Tal     | TALDO1   |   |   |   | x |   |
| 100260 | FBgn0000535 | eag          | KCNH5    |   | x |   |   |   |
| 104562 | FBgn0261609 | eIF-2alpha   | EIF2S1   |   |   | x |   |   |
| 108094 | FBgn0034915 | eIF6         | EIF6     |   |   |   | x | x |
| 107824 | FBgn0030241 | feo          | PRC1     |   |   | x |   |   |
| 103611 | FBgn0086698 | fritz        | C2orf86  |   | x |   |   | x |
| 107622 | FBgn0262743 | Fs(2)Ket     | KPNB1    | x |   | x | x | x |
| 106929 | FBgn0262126 | gho          | SEC24C   | x |   |   | x |   |
| 109300 | FBgn0025595 | GRHR         | GNRHR    | x |   |   | x |   |
| 101555 | FBgn0004838 | Hrb27C       | DAZAP1   | x |   | x |   |   |
| 100697 | FBgn0015245 | Hsp60        | HSPD1    |   |   |   |   | x |
| 108568 | FBgn0001233 | Hsp83        | HSP90AB1 | x |   | x |   |   |
| 101238 | FBgn0037501 | Ir84a        |          |   |   |   | x |   |
| 109514 | FBgn0040309 | Jafrac1      | PRDX2    |   |   | x | x | x |
| 100788 | FBgn0027654 | jdp          | DNAJC12  | x |   | x | x |   |
| 22125  | FBgn0010235 | Klc          | KLC1     |   |   | x | x | x |
| 39583  | FBgn0010235 | Klc          | KLC1     |   |   | x |   | x |
| 105955 | FBgn0051232 | koko         | FAM58A   |   | x |   |   |   |
| 5098   | FBgn0261574 | kug          | FAT1     |   |   |   | x |   |
| 106588 | FBgn0046704 | Liprin-alpha | PPFIA1   | x |   |   |   |   |
| 101758 | FBgn0027497 | Madm         | NRBP1    |   |   | x |   | x |
| 105486 | FBgn0261642 | mbl          | MBNL1    |   |   | x | x | x |
| 19688  | FBgn0011655 | Med          | SMAD4    |   |   | x |   |   |
| 106767 | FBgn0011655 | Med          | SMAD4    |   |   | x |   | x |
| 100812 | FBgn0029155 | Men-b        | ME1      |   |   |   | x | x |
| 109502 | FBgn0035473 | mge          | TOMM22   | x |   | x |   |   |
| 110193 | FBgn0262872 | milt         | TRAK1    |   |   |   |   | x |
| 108573 | FBgn0002787 | Mov34        | PSMD7    | x |   |   | x |   |
| 102982 | FBgn0050361 | mtt          | GRM4     |   |   |   | x |   |
| 103755 | FBgn0002891 | mus205       | REV3L    | x |   |   |   | x |
| 110689 | FBgn0031020 | Nat1         | NAA15    | x |   |   |   |   |
| 107717 | FBgn0086707 | ncm          | CWC22    | x |   |   |   |   |
| 108840 | FBgn0028274 | ns3          | LSG1     | x |   |   | x | x |
| 100713 | FBgn0036059 | nudE         | NDEL1    |   |   |   | x | x |
| 104688 | FBgn0004839 | otk          | PTK7     |   | x |   | x | x |
| 109812 | FBgn0020386 | Pk61C        | PDPK1    |   |   |   | x |   |
| 100628 | FBgn0032884 | Pomp         |          |   |   |   |   | x |
| 101409 | FBgn0086134 | Pros25       | PSMA2    | x |   |   |   |   |
| 105673 | FBgn0002284 | Pros26       | PSMB1    | x |   |   |   |   |
| 104373 | FBgn0261394 | Pros29       | PSMA4    | x |   |   |   | x |
| 100703 | FBgn0250843 | Pros35       | PSMA1    | x |   |   |   |   |
| 100620 | FBgn0020369 | Pros45       | PSMC5    | x |   |   |   |   |

|        |             |            |          |   |   |   |   |   |   |
|--------|-------------|------------|----------|---|---|---|---|---|---|
| 110659 | FBgn0015283 | Pros54     | PSMD4    | x |   |   | x |   |   |
| 108380 | FBgn0016697 | Prosalph5  | PSMA5    | x |   |   |   |   |   |
| 102016 | FBgn0023175 | Prosalph7  | PSMA3    | x |   |   | x |   | x |
| 103575 | FBgn0023174 | Prosbeta2  | PSMB7    | x |   |   |   |   |   |
| 100561 | FBgn0026380 | Prosbeta3  | PSMB3    | x |   |   | x |   |   |
| 107628 | FBgn0029134 | Prosbeta5  | PSMB5    | x |   |   |   |   |   |
| 110443 | FBgn0004370 | Ptp10D     | PTPRB    |   | x |   |   |   |   |
| 109796 | FBgn0028577 | pUf68      | PUF60    |   |   |   | x |   | x |
| 103945 | FBgn0014010 | Rab5       | RAB5A    |   |   |   | x | x |   |
| 110574 | FBgn0003206 | Ras64B     | RRAS2    | x |   |   |   |   |   |
| 110364 | FBgn0030067 | Rbm13      | MAK16    |   |   |   | x |   |   |
| 105622 | FBgn0035150 | Rev1       | REV1     |   |   |   | x |   |   |
| 107056 | FBgn0086911 | rg         | NBEA     | x | x |   |   |   |   |
| 105760 | FBgn0024196 | robl       | DYNLRB2  | x |   |   | x | x | x |
| 101369 | FBgn0037351 | RpL13A     | RPL13A   |   |   |   | x |   |   |
| 108309 | FBgn0002607 | RpL19      | RPL19    | x |   |   | x |   |   |
| 104021 | FBgn0035422 | RpL28      | RPL28    | x |   |   | x |   |   |
| 101391 | FBgn0086710 | RpL30      | RPL30    | x |   |   | x | x |   |
| 100797 | FBgn0037328 | RpL35A     | RPL35A   |   |   |   | x |   |   |
| 107295 | FBgn0261608 | RpL37A     | RPL37A   | x |   |   | x | x |   |
| 103939 | FBgn0028695 | Rpn1       | PSMD2    | x |   |   |   |   |   |
| 106457 | FBgn0028692 | Rpn2       | PSMD1    | x |   |   | x |   |   |
| 103942 | FBgn0028689 | Rpn6       | PSMD11   | x |   |   | x |   | x |
| 101467 | FBgn0028688 | Rpn7       | PSMD6    | x |   |   | x |   |   |
| 109062 | FBgn0033555 | RpS15Ab    | RPS15A   | x |   |   | x |   |   |
| 105298 | FBgn0019936 | RpS20      | RPS20    |   |   |   | x |   |   |
| 104676 | FBgn0261596 | RpS24      |          |   |   |   | x |   |   |
| 107108 | FBgn0039300 | RpS27      | RPS27    | x |   |   | x | x |   |
| 105279 | FBgn0261592 | RpS6       | RPS6     |   |   |   | x |   |   |
| 108834 | FBgn0028687 | Rpt1       | PSMC2    | x |   |   | x |   |   |
| 103143 | FBgn0005278 | Sam-S      | MAT2A    | x |   |   | x | x |   |
| 105989 | FBgn0260936 | scny       | USP36    | x |   |   | x |   |   |
| 107164 | FBgn0004888 | Scsalph    | SUCLG1   | x |   |   | x | x |   |
| 108085 | FBgn0086475 | sec3       | EXOC1    |   | x |   |   |   |   |
| 105836 | FBgn0034367 | sec6       | EXOC3    |   | x |   |   | x |   |
| 45032  | FBgn0262603 | sec8       | EXOC4    |   |   | x | x |   |   |
| 105653 | FBgn0262603 | sec8       | EXOC4    |   |   |   |   |   | x |
| 108941 | FBgn0028402 | Sin        | POLR3E   |   |   |   |   | x |   |
| 101449 | FBgn0003423 | slgA       | PRODH    | x |   |   | x | x |   |
| 103587 | FBgn0039626 | Slu7       | SLU7     |   |   |   | x |   |   |
| 103406 | FBgn0027783 | SMC2       | SMC2     |   |   |   | x |   |   |
| 100690 | FBgn0261789 | SmD2       | SNRPD2   |   |   |   | x |   |   |
| 106701 | FBgn0024308 | Smr        |          |   |   |   | x |   | x |
| 101404 | FBgn0005410 | sno        | SBNO1    | x |   |   |   |   |   |
| 108933 | FBgn0261792 | snRNP-U1-C | SNRPC    | x |   |   |   |   |   |
| 104367 | FBgn0039172 | Spase22-23 | SPCS3    |   |   |   | x |   |   |
| 100757 | FBgn0030306 | Spase25    | SPCS2    |   |   |   | x |   |   |
| 108828 | FBgn0016977 | spen       |          |   | x |   |   |   |   |
| 100751 | FBgn0036340 | SRm160     | SRRM1    | x |   |   | x |   |   |
| 102632 | FBgn0025702 | srpk79D    | SRPK3    |   |   |   |   |   | x |
| 101495 | FBgn0003517 | sta        | RPSA     | x |   |   |   |   |   |
| 108569 | FBgn0261041 | stj        | CACNA2D3 |   |   |   | x |   |   |

|        |             |          |         |   |   |   |   |
|--------|-------------|----------|---------|---|---|---|---|
| 101559 | FBgn0003654 | sw       | DYNC1I2 |   | x |   | x |
| 107264 | FBgn0086377 | Syx7     | STX7    |   | x |   |   |
| 101441 | FBgn0030365 | Tango4   | PLRG1   |   | x |   |   |
| 107645 | FBgn0031030 | Tao-1    | TAOK1   |   |   |   | x |
| 109705 | FBgn0026760 | Tehao    |         |   |   | x | x |
| 100094 | FBgn0035638 | Tektin-C | TEKT1   | x |   | x |   |
| 110432 | FBgn0004885 | tok      | TLL1    | x |   | x | x |
| 8894   | FBgn0011584 | Trp1     | SEC62   |   | x |   |   |
| 8895   | FBgn0011584 | Trp1     | SEC62   |   | x |   |   |
| 100570 | FBgn0026316 | UbcD10   | UBE2L3  |   | x |   | x |
| 100019 | FBgn0035965 | Use1     | USE1    |   | x |   |   |
| 100226 | FBgn0028554 | xl6      | SRSF7   | x |   |   |   |

<sup>1</sup> Human gene orthologs are identified using Hologene resources. Several of the genes were not identified to have a mammalian ortholog but subsequent analysis using BLAST revealed the following human orthologs. brp - CAST, Ir84a - GRIK5, Pomp - POMP, RpS24 - RPS24, Smr - NCOR1, spen - Mint, Tehao - TLR4.

---

**Table S2. List of genes in each enriched GO term group for synaptic apposition phenotypic class**

**Proteasome Subunits**

|             |                                                |
|-------------|------------------------------------------------|
| FBgn0020369 | 26S protease regulatory subunit 8              |
| FBgn0028692 | 26S proteasome non-ATPase regulatory subunit 1 |
| FBgn0028688 | 26S proteasome non-ATPase regulatory subunit 6 |
| FBgn0002787 | 26S proteasome non-ATPase regulatory subunit 7 |
| FBgn0029134 | Dmel_CG12323                                   |
| FBgn0028687 | Dmel_CG1341                                    |
| FBgn0028695 | Dmel_CG7762                                    |
| FBgn0086134 | Proteasome 25kD subunit                        |
| FBgn0002284 | Proteasome 26kD subunit                        |
| FBgn0261394 | Proteasome 29kD subunit                        |
| FBgn0250843 | Proteasome 35kD subunit                        |
| FBgn0015283 | Proteasome 54kD subunit                        |
| FBgn0016697 | Proteasome alpha subunit                       |
| FBgn0023175 | Proteasome alpha7 subunit                      |
| FBgn0023174 | Proteasome beta2 subunit                       |
| FBgn0028689 | Proteasome p44.5 subunit                       |
| FBgn0026380 | Proteasome subunit beta type-3                 |

**Mitotic Spindle Organization**

|             |                                    |
|-------------|------------------------------------|
| FBgn0002787 | Mov34                              |
| FBgn0029134 | Dmel_CG12323                       |
| FBgn0030086 | Dmel_CG7033                        |
| FBgn0028695 | Dmel_CG7762                        |
| FBgn0033342 | Dmel_CG8258                        |
| FBgn0001233 | Heat shock protein 83              |
| FBgn0086134 | Proteasome 25kD subunit            |
| FBgn0261394 | Proteasome 29kD subunit            |
| FBgn0002607 | Ribosomal protein L19              |
| FBgn0035422 | Ribosomal protein L28              |
| FBgn0086710 | Ribosomal protein L30              |
| FBgn0033555 | Ribosomal protein S15Ab            |
| FBgn0032444 | T-complex protein 1, delta subunit |
| FBgn0003517 | stubarista                         |

**Table S3. List of genes in each enriched GO term group for NMJ undergrowth phenotypic class**

**Spindle Organization**

|             |                                    |
|-------------|------------------------------------|
| FBgn0027903 | DNA polymerase delta small subunit |
| FBgn0027783 | Dmel_CG10212                       |
| FBgn0030276 | Dmel_CG1938                        |
| FBgn0030086 | Dmel_CG7033                        |
| FBgn0033342 | Dmel_CG8258                        |
| FBgn0001233 | Heat shock protein 83              |
| FBgn0002607 | Ribosomal protein L19              |
| FBgn0035422 | Ribosomal protein L28              |
| FBgn0086710 | Ribosomal protein L30              |
| FBgn0003654 | short wing                         |

**Table S4. List of genes in each enriched GO term group for NMJ overgrowth phenotypic class**

**Cell Differentiation**

|             |                                  |
|-------------|----------------------------------|
| FBgn0034367 | Exocyst complex component 3      |
| FBgn0004370 | Protein tyrosine phosphatase 10D |
| FBgn0000535 | ether a go-go                    |
| FBgn0086698 | fritz                            |
| FBgn0051232 | kokopelli                        |
| FBgn0004839 | off-track                        |
| FBgn0086911 | rugose                           |
| FBgn0016977 | split ends                       |

**Table S5. List of genes in each enriched GO term group for synaptic retractions phenotypic class**

**Proteasome**

FBgn0028692 26S proteasome non-ATPase regulatory subunit 1  
FBgn0002787 26S proteasome non-ATPase regulatory subunit 7  
FBgn0028687 Dmel\_CG1341  
FBgn0023175 Proteasome alpha7 subunit  
FBgn0028689 Proteasome p44.5 subunit  
FBgn0026380 Proteasome subunit beta type-3

**Mitotic Spindle Organization**

FBgn0002787 Mov34  
FBgn0030276 Dmel\_CG1938  
FBgn0036059 Nuclear distribution protein nudE homolog  
FBgn0039626 Pre-mRNA-splicing factor Slu7  
FBgn0030067 RNA-binding motif protein 13  
FBgn0086710 Ribosomal protein L30  
FBgn0033555 Ribosomal protein S15Ab  
FBgn0021760 chromosome bows



**Table S6. List of genes in each enriched GO term group for axonal transport phenotypic class**

**Cytoskeletal Part**

|             |                                           |
|-------------|-------------------------------------------|
| FBgn0030276 | Dmel_CG1938                               |
| FBgn0010235 | Kinesin light chain                       |
| FBgn0036059 | Nuclear distribution protein nudE homolog |
| FBgn0250789 | alpha Spectrin                            |
| FBgn0024196 | roadblock                                 |
| FBgn0003654 | short wing                                |

**Table S7. List of the total lines screened.**

| <b>Flybase gene ID</b> | <b>Gene name</b> | <b>VDRC line ID</b> | <b>Flybase gene ID</b> | <b>Gene name</b> | <b>VDRC line ID</b> |
|------------------------|------------------|---------------------|------------------------|------------------|---------------------|
| FBgn0036212            | CG11597          | 104729              | FBgn0015379            | dod              | 17051               |
| FBgn0011737            | wee              | 106329              | FBgn0033015            | d4               | 2682                |
| FBgn0030018            | slpr             | 106449              | FBgn0037250            | CG1074           | 1074                |
| FBgn0261854            | aPKC             | 105624              | FBgn0010531            | CCS              | 17753               |
| FBgn0262103            | CG42856          | 107458              | FBgn0039069            | CG6763           | 6763                |
| FBgn0000404            | CycA             | 103595              | FBgn0031459            | CG2862           | 2862                |
| FBgn0027508            | tankyrase        | 106238              | FBgn0037329            | CG12162          | 12162               |
| FBgn0010348            | Arf79F           | 103572              | FBgn0039053            | CG6738           | 6738                |
| FBgn0032180            | CG31714          | 102832              | FBgn0010097            | gammaTub37C      | 17566               |
| FBgn0004367            | mei-41           | 103624              | FBgn0031378            | CG15362          | 15362               |
| FBgn0036829            | Ir75d            | 106286              | FBgn0036300            | CG10688          | 10688               |
| FBgn0011826            | Pp2B-14D         | 103144              | FBgn0039218            | Rpb10            | 13628               |
| FBgn0027932            | Akap200          | 102374              | FBgn0086450            | su(r)            | 2194                |
| FBgn0004889            | tws              | 104167              | FBgn0261270            | SelD             | 8553                |
| FBgn0000442            | Pkg21D           | 103513              | FBgn0020370            | TppII            | 3991                |
| FBgn0031934            | Ntl              | 102776              | FBgn0262624            | Tmhs             | 12026               |
| FBgn0263199            | Galk             | 103656              | FBgn0040020            | MED21            | 17397               |
| FBgn0027497            | Madm             | 101758              | FBgn0050438            | CG30438          | 30438               |
| FBgn0261456            | hpo              | 104169              | FBgn0038862            | Ubpy             | 5798                |
| FBgn0039861            | pasha            | 107445              | FBgn0035715            | CG10103          | 10103               |
| FBgn0000028            | acj6             | 105292              | FBgn0030528            | CG11095          | 11095               |
| FBgn0016075            | vkg              | 106812              | FBgn0039301            | CG11875          | 11875               |
| FBgn0036428            | CG9238           | 100593              | FBgn0033549            | mms4             | 12936               |
| FBgn0031414            | eyes             | 106892              | FBgn0004861            | ph-p             | 18412               |
| FBgn0035891            | Oseg1            | 103598              | FBgn0039846            | CG11337          | 11337               |
| FBgn0086778            | gfA              | 100756              | FBgn0033578            | BBS4             | 13232               |
| FBgn0039015            | Tak12            | 104701              | FBgn0032031            | CG13390          | 13390               |
| FBgn0016032            | lbm              | 102739              | FBgn0051111            | CG31111          | 31111               |
| FBgn0038258            | CG7362           | 104218              | FBgn0030654            | CG15643          | 15643               |
| FBgn0036706            | CG6485           | 107552              | FBgn0250746            | Prosbeta7        | 12000               |
| FBgn0045980            | niki             | 100823              | FBgn0051126            | CG31126          | 31126               |
| FBgn0039796            | CG12069          | 100886              | FBgn0033210            | U2A              | 1406                |
| FBgn0033876            | synaptogyrin     | 100789              | FBgn0033235            | CG8728           | 8728                |
| FBgn0260003            | Dys              | 106401              | FBgn0030806            | CG13001          | 13001               |
| FBgn0085388            | IP3K2            | 102772              | FBgn0015828            | TfIIIEalpha      | 10415               |
| FBgn0039927            | CG11155          | 100883              | FBgn0037244            | CG14647          | 14647               |
| FBgn0024291            | Sir2             | 108241              | FBgn0004132            | boca             | 30498               |
| FBgn0030853            | CG5703           | 106650              | FBgn0000395            | cv-2             | 15671               |
| FBgn0001128            | Gpdh             | 105359              | FBgn0031603            | CG15432          | 15432               |
| FBgn0030964            | Pvf1             | 102699              | FBgn0039109            | CG10365          | 10365               |
| FBgn0031702            | fusl             | 104112              | FBgn0015509            | lin19            | 1877                |
| FBgn0033791            | Drl-2            | 102192              | FBgn0033183            | CG1620           | 1620                |
| FBgn0035026            | Fcp1             | 106253              | FBgn0026361            | Sep5             | 2916                |
| FBgn0053519            | Unc-89           | 106267              | FBgn0031630            | CG15629          | 15629               |
| FBgn0011241            | cbx              | 101755              | FBgn0011584            | Trp1             | 4758                |
| FBgn0028431            | Glu-RIB          | 106269              | FBgn0023522            | CG11596          | 11596               |
| FBgn0026063            | KP78b            | 105265              | FBgn0015218            | eIF-4E           | 4035                |
| FBgn0038603            | PKD              | 106255              | FBgn0035109            | CG13876          | 13876               |

|             |            |        |             |                  |       |
|-------------|------------|--------|-------------|------------------|-------|
| FBgn0032910 | CG9265     | 107467 | FBgn0036354 | Poc1             | 10191 |
| FBgn0000319 | Chc        | 103383 | FBgn0037741 | CG16908          | 16908 |
| FBgn0262476 | CG43066    | 101768 | FBgn0037648 | CG11975          | 11975 |
| FBgn0004839 | otk        | 104688 | FBgn0024841 | Pcd              | 1963  |
| FBgn0046332 | gskt       | 107429 | FBgn0033215 | CG1942           | 1942  |
| FBgn0026181 | rok        | 104675 | FBgn0051004 | CG31004          | 31004 |
| FBgn0085447 | sif        | 106832 | FBgn0025633 | CG13366          | 13366 |
| FBgn0031030 | Tao-1      | 107645 | FBgn0032720 | mRpL13           | 10603 |
| FBgn0260452 | CG13984    | 101831 | FBgn0038976 | CG7048           | 7048  |
| FBgn0024846 | p38b       | 108099 | FBgn0039590 | CG10011          | 10011 |
| FBgn0034489 | ppk6       | 101091 | FBgn0033948 | CG12863          | 12863 |
| FBgn0038744 | CG4733     | 107621 | FBgn0025885 | Inos             | 11143 |
| FBgn0005779 | PpD6       | 104211 | FBgn0003319 | Sb               | 4316  |
| FBgn0030844 | ppk23      | 106873 | FBgn0020386 | Pdk1             | 1210  |
| FBgn0045035 | tefu       | 108074 | FBgn0030141 | Gga              | 3002  |
| FBgn0260005 | wtrw       | 107423 | FBgn0033528 | trsn             | 11761 |
| FBgn0033313 | Cirl       | 100749 | FBgn0035850 | Atg18            | 7986  |
| FBgn0034723 | CG13506    | 104632 | FBgn0003462 | Sod              | 11793 |
| FBgn0029155 | Men-b      | 100812 | FBgn0037761 | CG8534           | 8534  |
| FBgn0000229 | bsk        | 104569 | FBgn0024252 | Ark              | 6829  |
| FBgn0027569 | cert       | 103563 | FBgn0011648 | Mad              | 12399 |
| FBgn0003733 | tor        | 101154 | FBgn0041100 | park             | 10523 |
| FBgn0086251 | del        | 100497 | FBgn0000139 | ash2             | 6677  |
| FBgn0036877 | CG9452     | 100887 | FBgn0035529 | CG1319           | 1319  |
| FBgn0020880 | CG7179     | 100471 | FBgn0036643 | Syx8             | 4109  |
| FBgn0051235 | CG31235    | 107974 | FBgn0028372 | isopeptidase-T-3 | 11025 |
| FBgn0033708 | CG8850     | 104098 | FBgn0015774 | NetB             | 10521 |
| FBgn0029128 | tyn        | 100426 | FBgn0031449 | CG31689          | 31689 |
| FBgn0038309 | CG6499     | 100416 | FBgn0027617 | CG5808           | 5808  |
| FBgn0263255 | hppy       | 103580 | FBgn0036492 | Best3            | 12327 |
| FBgn0026316 | UbcD10     | 100570 | FBgn0027558 | pgant3           | 4445  |
| FBgn0003371 | sgg        | 101538 | FBgn0036066 | CG14160          | 14160 |
| FBgn0031414 | eys        | 107636 | FBgn0260866 | dnr1             | 12489 |
| FBgn0050344 | CG30344    | 106870 | FBgn0035523 | CG1311           | 1311  |
| FBgn0261524 | lic        | 106822 | FBgn0037084 | Syx6             | 7736  |
| FBgn0086657 | ik2        | 103748 | FBgn0000115 | Arf72A           | 6025  |
| FBgn0039140 | Miro       | 106683 | FBgn0034488 | CG11208          | 11208 |
| FBgn0023169 | SNF1A      | 106200 | FBgn0034897 | Sesn             | 11299 |
| FBgn0003660 | Syb        | 102922 | FBgn0000482 | dor              | 3093  |
| FBgn0019990 | Gcn2       | 103976 | FBgn0033985 | CG10257          | 10257 |
| FBgn0015277 | Pi3K59F    | 100296 | FBgn0034110 | Atg9             | 3615  |
| FBgn0029830 | Grip       | 103551 | FBgn0033792 | CG13325          | 13325 |
| FBgn0031213 | galectin   | 107054 | FBgn0033460 | sec24            | 1472  |
| FBgn0042710 | Hex-t2     | 100218 | FBgn0030011 | Gbeta5           | 10763 |
| FBgn0034644 | CG10082    | 103749 | FBgn0035871 | CG7188           | 7188  |
| FBgn0024273 | WASp       | 108220 | FBgn0011655 | Med              | 1775  |
| FBgn0004784 | inaC       | 101719 | FBgn0000482 | dor              | 3093  |
| FBgn0043791 | CG8147     | 100052 | FBgn0034503 | MED8             | 13867 |
| FBgn0034282 | Mapmodulin | 100283 | FBgn0001180 | hb               | 9786  |
| FBgn0037325 | CG12147    | 101875 | FBgn0038140 | CG8784           | 8784  |
| FBgn0036941 | CG7335     | 100062 | FBgn0011659 | Mlh1             | 11482 |

|             |           |        |             |           |       |
|-------------|-----------|--------|-------------|-----------|-------|
| FBgn0032593 | trpgamma  | 105280 | FBgn0037530 | CG2943    | 2943  |
| FBgn0019643 | Dat       | 105064 | FBgn0051119 | HdacX     | 31119 |
| FBgn0003169 | put       | 107071 | FBgn0033460 | sec24     | 1472  |
| FBgn0023090 | dtr       | 103600 | FBgn0030241 | feo       | 11207 |
| FBgn0032632 | CG6380    | 100121 | FBgn0039702 | Vps16B    | 18112 |
| FBgn0262103 | CG42856   | 106268 | FBgn0045862 | btz       | 12878 |
| FBgn0034568 | CG3216    | 107985 | FBgn0011655 | Med       | 1775  |
| FBgn0035266 | CG7995    | 101869 | FBgn0015351 | CG14906   | 14906 |
| FBgn0035236 | CG12004   | 101732 | FBgn0032635 | CG15141   | 15141 |
| FBgn0036742 | CG7497    | 106421 | FBgn0002932 | neur      | 11988 |
| FBgn0044046 | Ilp7      | 105024 | FBgn0037199 | CG11137   | 11137 |
| FBgn0003079 | phl       | 107766 | FBgn0033189 | Cyt-b5    | 2140  |
| FBgn0031451 | CG9961    | 101702 | FBgn0040087 | p115      | 1422  |
| FBgn0015803 | rtGEF     | 100583 | FBgn0020912 | Ptx1      | 1447  |
| FBgn0041205 | key       | 100257 | FBgn0086445 | l(2)37Cd  | 10563 |
| FBgn0001186 | Hex-A     | 104680 | FBgn0019982 | GsII      | 15441 |
| FBgn0004864 | hop       | 102830 | FBgn0030521 | CG10992   | 10992 |
| FBgn0026379 | Pten      | 101475 | FBgn0038325 | CG6194    | 6194  |
| FBgn0002673 | twe       | 104147 | FBgn0035317 | osm-1     | 13809 |
| FBgn0042693 | PP2A-B'   | 107057 | FBgn0031987 | CG12375   | 12375 |
| FBgn0020622 | Pi3K21B   | 104179 | FBgn0011741 | Actr13E   | 11678 |
| FBgn0013435 | cdc2rk    | 100299 | FBgn0036427 | CG4613    | 4613  |
| FBgn0031802 | ppk7      | 100643 | FBgn0002641 | mal       | 1692  |
| FBgn0034711 | CG3290    | 104586 | FBgn0029092 | ced-6     | 11804 |
| FBgn0038853 | RhoGAP93B | 100136 | FBgn0014863 | Mlp84B    | 1019  |
| FBgn0037365 | CG2104    | 100216 | FBgn0035238 | CG12104   | 12104 |
| FBgn0039858 | CycG      | 106846 | FBgn0263235 | Phae2     | 16997 |
| FBgn0036414 | nan       | 100090 | FBgn0035470 | CG14980   | 14980 |
| FBgn0013955 | PR2       | 100169 | FBgn0260860 | Bet5      | 1359  |
| FBgn0035425 | CG17746   | 100178 | FBgn0010638 | Sec61beta | 10130 |
| FBgn0036544 | sff       | 100717 | FBgn0261995 | CG42813   | 31063 |
| FBgn0033443 | CG1698    | 101947 | FBgn0037578 | CG9601    | 9601  |
| FBgn0023510 | Rbcn-3B   | 100294 | FBgn0031816 | CG16947   | 16947 |
| FBgn0011294 | a5        | 100657 | FBgn0022027 | Vps25     | 14750 |
| FBgn0004603 | Src42A    | 100708 | FBgn0002607 | RpL19     | 2746  |
| FBgn0000273 | Pka-C1    | 101524 | FBgn0051072 | Lerp      | 31072 |
| FBgn0028552 | gammaSnap | 100738 | FBgn0034915 | eIF6      | 17611 |
| FBgn0261873 | sdt       | 100685 | FBgn0003189 | r         | 18572 |
| FBgn0031855 | CG11221   | 100163 | FBgn0250850 | rig       | 30149 |
| FBgn0003295 | ru        | 101684 | FBgn0051002 | CG31002   | 31002 |
| FBgn0035390 | scramb2   | 104647 | FBgn0036318 | CG11009   | 11009 |
| FBgn0002937 | ninaB     | 104683 | FBgn0004888 | Scsalpha  | 1065  |
| FBgn0030385 | Ir11a     | 100422 | FBgn0030004 | CG10958   | 10958 |
| FBgn0004462 | Pk17E     | 101951 | FBgn0032265 | CG18301   | 18301 |
| FBgn0032083 | CG9541    | 102912 | FBgn0038965 | mats      | 13852 |
| FBgn0024179 | wit       | 103808 | FBgn0035162 | CG13900   | 13900 |
| FBgn0025625 | SIK2      | 103739 | FBgn0038535 | alt       | 18212 |
| FBgn0034264 | CG10933   | 104282 | FBgn0033179 | p47       | 11139 |
| FBgn0004646 | ogre      | 103816 | FBgn0029704 | CG2982    | 2982  |
| FBgn0013272 | Gp150     | 100134 | FBgn0035630 | CG10576   | 10576 |
| FBgn0261985 | Ptpmeg    | 103740 | FBgn0015245 | Hsp60     | 12101 |

|             |             |        |             |            |       |
|-------------|-------------|--------|-------------|------------|-------|
| FBgn0261549 | rdgA        | 102909 | FBgn0004656 | fs(1)h     | 2252  |
| FBgn0004624 | CaMKII      | 100265 | FBgn0035142 | hipk       | 17090 |
| FBgn0032350 | CG6287      | 100689 | FBgn0033460 | sec24      | 1472  |
| FBgn0029663 | CG10804     | 100400 | FBgn0033017 | CG10465    | 10465 |
| FBgn0052687 | CG32687     | 100795 | FBgn0028683 | spt4       | 12372 |
| FBgn0003140 | PpY-55A     | 102021 | FBgn0086657 | ik2        | 2615  |
| FBgn0016984 | sktl        | 101624 | FBgn0034067 | CG8399     | 8399  |
| FBgn0038912 | CG6656      | 104175 | FBgn0003460 | so         | 11121 |
| FBgn0011205 | fbl         | 101437 | FBgn0014018 | Rel        | 11992 |
| FBgn0036376 | Liprin-beta | 103645 | FBgn0034168 | CG15614    | 15614 |
| FBgn0040208 | katanin-60  | 38368  | FBgn0037375 | kat-60L1   | 1193  |
| FBgn0037679 | CG8866      | 103725 | FBgn0038926 | CG13409    | 13409 |
| FBgn0035957 | CG5144      | 104240 | FBgn0026404 | Nc         | 8091  |
| FBgn0261379 | rad         | 101811 | FBgn0034537 | DMAP1      | 11132 |
| FBgn0022936 | CycH        | 104312 | FBgn0044452 | Atg2       | 1241  |
| FBgn0019949 | Cdk9        | 103561 | FBgn0035850 | Atg18      | 7986  |
| FBgn0037501 | Ir84a       | 101238 | FBgn0028425 | JhI-21     | 12317 |
| FBgn0000320 | eya         | 108071 | FBgn0037375 | kat-60L1   | 1193  |
| FBgn0024227 | ial         | 104051 | FBgn0026176 | skpB       | 8881  |
| FBgn0051140 | CG31140     | 101347 | FBgn0003041 | pbl        | 8114  |
| FBgn0028978 | trbl        | 106774 | FBgn0034863 | skpF       | 12227 |
| FBgn0002917 | na          | 103754 | FBgn0250789 | alpha-Spec | 1977  |
| FBgn0025573 | PpN58A      | 102060 | FBgn0030230 | Rph        | 11556 |
| FBgn0032042 | CG13398     | 38669  | FBgn0010516 | wal        | 8996  |
| FBgn0032889 | CG9331      | 107680 | FBgn0034656 | CG17922    | 17922 |
| FBgn0259246 | brp         | 107748 | FBgn0028692 | Rpn2       | 11888 |
| FBgn0033052 | SCAP        | 106926 | FBgn0038577 | CG12321    | 12321 |
| FBgn0015622 | Cnx99A      | 100740 | FBgn0033807 | AQP        | 12251 |
| FBgn0259246 | brp         | 104630 | FBgn0025790 | TBPH       | 10327 |
| FBgn0035945 | CG5026      | 105674 | FBgn0036290 | CG10638    | 10638 |
| FBgn0001248 | Idh         | 100554 | FBgn0086657 | ik2        | 2615  |
| FBgn0003425 | sli         | 38233  | FBgn0011742 | Arp14D     | 9901  |
| FBgn0029157 | ssh         | 107998 | FBgn0036992 | CG11796    | 11796 |
| FBgn0013750 | Arf51F      | 100726 | FBgn0005632 | faf        | 1945  |
| FBgn0032042 | CG13398     | 38668  | FBgn0028691 | Rpn9       | 10230 |
| FBgn0005411 | U2af50      | 107723 | FBgn0030755 | CG9906     | 9906  |
| FBgn0040298 | Myt1        | 105157 | FBgn0031854 | TTLL3A     | 11323 |
| FBgn0031784 | CG9222      | 104259 | FBgn0034641 | mahj       | 10080 |
| FBgn0250823 | gish        | 106826 | FBgn0261574 | kug        | 7749  |
| FBgn0020391 | Nrk         | 103804 | FBgn0031970 | CG7227     | 7227  |
| FBgn0038655 | CG14297     | 102071 | FBgn0038659 | endoA      | 14296 |
| FBgn0035490 | CG1136      | 107455 | FBgn0033476 | oys        | 18445 |
| FBgn0259246 | brp         | 104422 | FBgn0037408 | NPFR1      | 1147  |
| FBgn0000711 | flw         | 104677 | FBgn0022213 | Cas        | 13281 |
| FBgn0022768 | Pp2C1       | 105249 | FBgn0038983 | CG5326     | 5326  |
| FBgn0027505 | rab3-GAP    | 106905 | FBgn0003380 | Sh         | 12348 |
| FBgn0030613 | rab3-GEF    | 106194 | FBgn0019985 | mGluRA     | 11144 |
| FBgn0033159 | Dscam       | 36233  | FBgn0031106 | Syx16      | 1467  |
| FBgn0038788 | Sirt2       | 103790 | FBgn0014010 | Rab5       | 3664  |
| FBgn0029006 | lack        | 107349 | FBgn0034275 | CG5002     | 5002  |
| FBgn0027587 | CG7028      | 107042 | FBgn0030504 | CG2691     | 2691  |

|             |         |        |             |           |       |
|-------------|---------|--------|-------------|-----------|-------|
| FBgn0015372 | chrw    | 103039 | FBgn0030391 | Rab40     | 1900  |
| FBgn0039665 | CG2310  | 104126 | FBgn0039543 | CG12428   | 12428 |
| FBgn0039111 | Plip    | 104774 | FBgn0015789 | Rab10     | 17060 |
| FBgn0017561 | Ork1    | 104883 | FBgn0086134 | Pros25    | 5266  |
| FBgn0035892 | exo70   | 103717 | FBgn0033672 | rho-7     | 8972  |
| FBgn0037167 | CG11425 | 103037 | FBgn0030228 | CG1826    | 1826  |
| FBgn0015618 | Cdk8    | 107187 | FBgn0036039 | CG18177   | 18177 |
| FBgn0065109 | ppk11   | 107741 | FBgn0261976 | Psf2      | 18013 |
| FBgn0259246 | brp     | 21135  | FBgn0033196 | CG1358    | 1358  |
| FBgn0261283 | HLH106  | 37640  | FBgn0011573 | Cdc37     | 12019 |
| FBgn0003425 | sli     | 20210  | FBgn0039117 | tst       | 10210 |
| FBgn0010315 | CycD    | 105361 | FBgn0031606 | CG15439   | 15439 |
| FBgn0260745 | mfas    | 103621 | FBgn0034936 | CG2970    | 2970  |
| FBgn0036150 | Ir68a   | 108047 | FBgn0011586 | e(r)      | 1871  |
| FBgn0029006 | lack    | 24680  | FBgn0035771 | sec63     | 8583  |
| FBgn0015614 | CanB2   | 104370 | FBgn0022288 | I(2)09851 | 12792 |
| FBgn0015544 | spag    | 103353 | FBgn0031361 | CG17652   | 17652 |
| FBgn0000536 | eas     | 103784 | FBgn0037360 | CG2182    | 2182  |
| FBgn0034179 | CG6805  | 107728 | FBgn0039115 | CG10214   | 10214 |
| FBgn0085386 | CG34357 | 105185 | FBgn0035622 | CG10590   | 10590 |
| FBgn0011283 | Pbprp5  | 103254 | FBgn0037880 | CG17726   | 17726 |
| FBgn0010909 | msn     | 101517 | FBgn0030572 | mRpS25    | 14413 |
| FBgn0028978 | trbl    | 22113  | FBgn0037146 | CG7470    | 7470  |
| FBgn0032666 | CG5758  | 108061 | FBgn0000964 | tj        | 10034 |
| FBgn0003139 | PpV     | 101997 | FBgn0035272 | mRpL46    | 13922 |
| FBgn0034950 | Pask    | 107025 | FBgn0031069 | CG12703   | 12703 |
| FBgn0032884 | Pomp    | 100628 | FBgn0038424 | CG17565   | 17565 |
| FBgn0052843 | Dh31-R1 | 101995 | FBgn0005410 | sno       | 1903  |
| FBgn0030384 | CG2577  | 105471 | FBgn0031047 | CG14213   | 14213 |
| FBgn0033052 | SCAP    | 7317   | FBgn0004636 | R         | 1956  |
| FBgn0086604 | CG12484 | 104814 | FBgn0042103 | CG18746   | 18746 |
| FBgn0014007 | Ptp69D  | 104761 | FBgn0039068 | CG13827   | 13827 |
| FBgn0024832 | AP-50   | 103390 | FBgn0028688 | Rpn7      | 5378  |
| FBgn0027504 | CG8878  | 100985 | FBgn0260935 | ird1      | 9746  |
| FBgn0035619 | CG10592 | 104767 | FBgn0039751 | CG1983    | 1983  |
| FBgn0039528 | dsd     | 104368 | FBgn0033191 | CG1598    | 1598  |
| FBgn0010403 | Os-E    | 102252 | FBgn0026056 | Rlip      | 11622 |
| FBgn0261261 | plx     | 106969 | FBgn0011710 | Sep1      | 1403  |
| FBgn0035089 | Phk-3   | 106938 | FBgn0030121 | CG17446   | 17446 |
| FBgn0031279 | CG3544  | 105459 | FBgn0039680 | CAP-D2    | 1911  |
| FBgn0261509 | haf     | 101124 | FBgn0032846 | CG10721   | 10721 |
| FBgn0260006 | drd     | 103032 | FBgn0035064 | CG16912   | 16912 |
| FBgn0261244 | inaE    | 103713 | FBgn0043799 | CG31381   | 31381 |
| FBgn0033159 | Dscam   | 3115   | FBgn0039116 | CG10375   | 10375 |
| FBgn0040375 | CG13760 | 106483 | FBgn0029791 | CG4096    | 4096  |
| FBgn0038952 | CG7069  | 101116 | FBgn0261479 | nero      | 2245  |
| FBgn0015331 | abs     | 107031 | FBgn0002783 | mor       | 18740 |
| FBgn0036448 | mop     | 104860 | FBgn0038678 | mRpL55    | 14283 |
| FBgn0261279 | lqfR    | 103719 | FBgn0037110 | ORMDL     | 14577 |
| FBgn0024290 | Slob    | 100987 | FBgn0035553 | CG13722   | 13722 |
| FBgn0036723 | CG12229 | 101097 | FBgn0038721 | CG16718   | 16718 |

|             |            |        |             |               |       |
|-------------|------------|--------|-------------|---------------|-------|
| FBgn0000464 | Lar        | 107996 | FBgn0038964 | Nop56         | 13849 |
| FBgn0028341 | l(1)G0232  | 104427 | FBgn0029736 | CG4041        | 4041  |
| FBgn0029688 | lva        | 106476 | FBgn0028961 | AlstR         | 2872  |
| FBgn0035539 | slow       | 106464 | FBgn0035449 | CG14971       | 14971 |
| FBgn0000449 | dib        | 101117 | FBgn0000173 | ben           | 18319 |
| FBgn0010441 | pll        | 103774 | FBgn0002121 | l(2)gl        | 2671  |
| FBgn0045497 | Gr22e      | 108056 | FBgn0030582 | CG14411       | 14411 |
| FBgn0040056 | CG17698    | 105884 | FBgn0036546 | elgi          | 17033 |
| FBgn0026438 | Eaat2      | 104371 | FBgn0086680 | vv1           | 10037 |
| FBgn0040376 | CG13759    | 107039 | FBgn0024365 | CG12773       | 12773 |
| FBgn0039852 | nyo        | 102187 | FBgn0030218 | CG1628        | 1628  |
| FBgn0030795 | ppk28      | 100946 | FBgn0010240 | Lcch3         | 17336 |
| FBgn0052484 | Sk2        | 101018 | FBgn0004168 | 5-HT1A        | 16720 |
| FBgn0083992 | Mkp        | 104374 | FBgn0004456 | mew           | 1771  |
| FBgn0031414 | ey5        | 106942 | FBgn0035741 | BBS1          | 14825 |
| FBgn0015399 | kek1       | 101166 | FBgn0020621 | Pkn           | 2049  |
| FBgn0039851 | mey        | 106568 | FBgn0261403 | sxc           | 10392 |
| FBgn0023083 | fray       | 106919 | FBgn0030289 | CG1597        | 1597  |
| FBgn0031696 | Bub1       | 101096 | FBgn0034401 | CG15100       | 15100 |
| FBgn0011817 | nmo        | 104885 | FBgn0019925 | Surf4         | 6202  |
| FBgn0003009 | ord        | 105890 | FBgn0011566 | Bzd           | 13761 |
| FBgn0032187 | CG4839     | 100999 | FBgn0024804 | Dbp80         | 17023 |
| FBgn0028360 | l(1)G0148  | 104902 | FBgn0038738 | CG4572        | 4572  |
| FBgn0035143 | Ppm1       | 101257 | FBgn0038427 | ema           | 12753 |
| FBgn0026255 | clumsy     | 105870 | FBgn0005592 | btl           | 32134 |
| FBgn0039916 | CG9935     | 102351 | FBgn0030122 | CG16892       | 16892 |
| FBgn0010379 | Akt1       | 103703 | FBgn0005626 | ple           | 10118 |
| FBgn0022029 | l(2)k01209 | 106934 | FBgn0037447 | Neurochondrin | 2330  |
| FBgn0051097 | CG31097    | 107652 | FBgn0010435 | emp           | 2727  |
| FBgn0013763 | CG5210     | 100906 | FBgn0031356 | CG17660       | 17660 |
| FBgn0086361 | alph       | 105483 | FBgn0004373 | fwd           | 7004  |
| FBgn0031937 | CG13795    | 102250 | FBgn0028402 | Sin           | 10582 |
| FBgn0026323 | Tak1       | 101357 | FBgn0035205 | CG2469        | 2469  |
| FBgn0261688 | Gyc76C     | 106525 | FBgn0029763 | CG4165        | 4165  |
| FBgn0036187 | CG11660    | 105395 | FBgn0031457 | CG3077        | 3077  |
| FBgn0052056 | scrambl    | 107024 | FBgn0039639 | CG14512       | 14512 |
| FBgn0036862 | CG9619     | 103044 | FBgn0086442 | mib2          | 17492 |
| FBgn0035008 | CG3494     | 102315 | FBgn0037492 | CG10050       | 10050 |
| FBgn0030208 | PPP4R2r    | 105399 | FBgn0027599 | CG2790        | 2790  |
| FBgn0260003 | Dys        | 106578 | FBgn0030000 | CG2260        | 2260  |
| FBgn0031518 | CG3277     | 108052 | FBgn0037942 | CG14721       | 14721 |
| FBgn0024291 | Sir2       | 105502 | FBgn0261792 | snRNP-U1-C    | 5454  |
| FBgn0025682 | scf        | 105422 | FBgn0262872 | milt          | 13777 |
| FBgn0028410 | Pk34A      | 101146 | FBgn0033038 | CG7791        | 7791  |
| FBgn0026060 | Mipp2      | 108018 | FBgn0035528 | CG15012       | 15012 |
| FBgn0031044 | MKP-4      | 104884 | FBgn0027619 | Adam          | 12131 |
| FBgn0034136 | DAT        | 106961 | FBgn0051249 | CG31249       | 31249 |
| FBgn0013759 | CASK       | 104793 | FBgn0036359 | CG14105       | 14105 |
| FBgn0032640 | Sgt        | 104320 | FBgn0086446 | l(2)37Ce      | 17347 |
| FBgn0043841 | vir-1      | 102534 | FBgn0031149 | CG1518        | 1518  |
| FBgn0260933 | rempA      | 103424 | FBgn0002938 | ninaC         | 5125  |

|             |           |        |             |           |       |
|-------------|-----------|--------|-------------|-----------|-------|
| FBgn0028978 | trbl      | 22114  | FBgn0000257 | car       | 12230 |
| FBgn0015380 | drl       | 100039 | FBgn0037490 | CG10053   | 10053 |
| FBgn0032006 | Pvr       | 105353 | FBgn0039205 | CG13623   | 13623 |
| FBgn0011829 | Ret       | 107648 | FBgn0021874 | Nle       | 2863  |
| FBgn0028644 | beat-Ic   | 105066 | FBgn0030365 | Tango4    | 1796  |
| FBgn0027515 | CG7115    | 103354 | FBgn0033324 | CG14744   | 14744 |
| FBgn0036553 | CG17027   | 103270 | FBgn0040066 | wds       | 17437 |
| FBgn0045038 | Proct     | 102488 | FBgn0039104 | CG10252   | 10252 |
| FBgn0260972 | alc       | 104489 | FBgn0015283 | Pros54    | 7619  |
| FBgn0003008 | or        | 104019 | FBgn0029995 | CG2256    | 2256  |
| FBgn0041087 | wun2      | 103452 | FBgn0003423 | slgA      | 1417  |
| FBgn0085413 | CG34384   | 102481 | FBgn0039282 | Bili      | 11848 |
| FBgn0051469 | CG31469   | 102474 | FBgn0039149 | CG18428   | 18428 |
| FBgn0031575 | Cep97     | 103357 | FBgn0024947 | NTPase    | 3059  |
| FBgn0051782 | CG31782   | 100145 | FBgn0040389 | mRpL14    | 14048 |
| FBgn0031936 | CG13794   | 102583 | FBgn0037926 | Elp1      | 10535 |
| FBgn0016930 | smi35A    | 101376 | FBgn0029975 | CG1444    | 1444  |
| FBgn0052373 | CG32373   | 101586 | FBgn0032381 | Mal-B1    | 14934 |
| FBgn0262603 | sec8      | 105653 | FBgn0035624 | Eaf6      | 12756 |
| FBgn0015803 | rtGEF     | 105093 | FBgn0029879 | Apc7      | 14444 |
| FBgn0040333 | CG13762   | 101019 | FBgn0260446 | GABA-B-R1 | 15274 |
| FBgn0026061 | Mipp1     | 101634 | FBgn0039774 | CDase     | 1471  |
| FBgn0086475 | sec3      | 108085 | FBgn0038454 | CG10324   | 10324 |
| FBgn0039421 | CG6036    | 105568 | FBgn0050291 | CG30291   | 30291 |
| FBgn0037218 | aux       | 103426 | FBgn0025684 | CG15438   | 15438 |
| FBgn0016126 | CaMKI     | 101380 | FBgn0039381 | CG17370   | 17370 |
| FBgn0038902 | CG6800    | 104255 | FBgn0030344 | CG2025    | 2025  |
| FBgn0035049 | Mmp1      | 101505 | FBgn0033431 | CG1827    | 1827  |
| FBgn0260750 | CG31873   | 105621 | FBgn0039126 | CG13601   | 13601 |
| FBgn0025821 | I-t       | 105565 | FBgn0031020 | Nat1      | 12202 |
| FBgn0026136 | CklIbeta2 | 102633 | FBgn0030336 | CG1578    | 1578  |
| FBgn0039909 | CG1970    | 108068 | FBgn0030573 | nmdyn-D6  | 5310  |
| FBgn0003366 | sev       | 107048 | FBgn0016977 | spen      | 18497 |
| FBgn0026196 | nop5      | 105614 | FBgn0050496 | CG30496   | 30496 |
| FBgn0013749 | Arf102F   | 101456 | FBgn0037543 | CG10903   | 10903 |
| FBgn0036896 | wnd       | 103410 | FBgn0032536 | Ance-3    | 17988 |
| FBgn0030245 | CG1637    | 101368 | FBgn0039189 | CG18528   | 18528 |
| FBgn0032916 | CG9257    | 103425 | FBgn0039867 | CstF-50   | 2261  |
| FBgn0034558 | CG9236    | 101474 | FBgn0035169 | CG13890   | 13890 |
| FBgn0027492 | wdb       | 101406 | FBgn0035518 | CG15011   | 15011 |
| FBgn0024734 | PRL-1     | 107836 | FBgn0017581 | Lk6       | 17342 |
| FBgn0262866 | S6kII     | 101451 | FBgn0039732 | CG15525   | 15525 |
| FBgn0038279 | CG3837    | 105549 | FBgn0042105 | CG18748   | 18748 |
| FBgn0045478 | Gr64b     | 108278 | FBgn0022246 | Rpp30     | 11606 |
| FBgn0038816 | Lrrk      | 105630 | FBgn0032955 | CG2201    | 2201  |
| FBgn0040388 | boi       | 108265 | FBgn0030484 | CG1681    | 1681  |
| FBgn0028429 | I-2       | 101547 | FBgn0028274 | ns3       | 14788 |
| FBgn0035445 | CG12014   | 105970 | FBgn0030037 | CG12125   | 12125 |
| FBgn0261401 | Ir75c     | 101682 | FBgn0031566 | CG2818    | 2818  |
| FBgn0261089 | Sytalpa   | 100957 | FBgn0039650 | Mesh1     | 11900 |
| FBgn0024814 | Clc       | 106632 | FBgn0027507 | CG1344    | 1344  |



|             |            |        |             |           |       |
|-------------|------------|--------|-------------|-----------|-------|
| FBgn0003132 | Pp1-13C    | 107770 | FBgn0038463 | CG3534    | 3534  |
| FBgn0033615 | CG7741     | 107799 | FBgn0025117 | und       | 4008  |
| FBgn0263047 | CG43342    | 101299 | FBgn0035692 | CG13298   | 13298 |
| FBgn0030864 | CG8173     | 105661 | FBgn0037372 | CG2091    | 2091  |
| FBgn0014368 | nol        | 103333 | FBgn0037297 | CG1116    | 1116  |
| FBgn0022709 | Adk1       | 104475 | FBgn0039244 | CG11069   | 11069 |
| FBgn0032702 | CG10376    | 101335 | FBgn0040319 | Gclc      | 2259  |
| FBgn0034789 | PIP5K59B   | 108104 | FBgn0031836 | CG11050   | 11050 |
| FBgn0025702 | srpk79D    | 102632 | FBgn0086909 | CG31751   | 31751 |
| FBgn0037315 | Cerk       | 101550 | FBgn0030411 | CG2540    | 2540  |
| FBgn0028401 | Snap24     | 108209 | FBgn0033005 | CG3107    | 3107  |
| FBgn0002719 | Men        | 104016 | FBgn0001259 | in        | 16993 |
| FBgn0024319 | Nach       | 106647 | FBgn0039790 | CG2246    | 2246  |
| FBgn0035167 | Gr61a      | 106007 | FBgn0039259 | CG11781   | 11781 |
| FBgn0051673 | CG31673    | 101618 | FBgn0005278 | Sam-S     | 2674  |
| FBgn0086911 | rg         | 107056 | FBgn0030177 | CG2972    | 2972  |
| FBgn0037788 | CG3940     | 108233 | FBgn0030306 | Spase25   | 1751  |
| FBgn0040505 | Alk        | 107083 | FBgn0028480 | CG17841   | 17841 |
| FBgn0052568 | CG32568    | 103317 | FBgn0035811 | CG12262   | 12262 |
| FBgn0030761 | CG9784     | 108075 | FBgn0037363 | CG1347    | 1347  |
| FBgn0262516 | trpml      | 108088 | FBgn0029820 | CG16721   | 16721 |
| FBgn0005564 | Shal       | 103363 | FBgn0032873 | CG2614    | 2614  |
| FBgn0037491 | CG1227     | 105610 | FBgn0262124 | uex       | 40084 |
| FBgn0261988 | Gprk2      | 101463 | FBgn0033454 | CG1671    | 1671  |
| FBgn0025455 | CycT       | 103387 | FBgn0026086 | Adar      | 12598 |
| FBgn0033079 | Fmo-2      | 101452 | FBgn0053096 | CG33096   | 33096 |
| FBgn0004369 | Ptp99A     | 103457 | FBgn0036909 | CG15881   | 15881 |
| FBgn0035371 | CG9977     | 106749 | FBgn0032536 | Ance-3    | 17988 |
| FBgn0020496 | CtBP       | 107313 | FBgn0087013 | Karybeta3 | 1059  |
| FBgn0250871 | pot        | 105189 | FBgn0039050 | CG17110   | 17110 |
| FBgn0041231 | Gr68a      | 105720 | FBgn0013811 | Dhc62B    | 15804 |
| FBgn0085414 | dpr12      | 106788 | FBgn0034387 | Cyp12b2   | 15077 |
| FBgn0011300 | babo       | 106092 | FBgn0033744 | CG12370   | 12370 |
| FBgn0024245 | dnt        | 106056 | FBgn0031619 | CG3355    | 3355  |
| FBgn0039928 | cals       | 105111 | FBgn0035909 | ergic53   | 6822  |
| FBgn0040285 | Scamp      | 106761 | FBgn0033904 | CG18327   | 18327 |
| FBgn0026371 | SAK        | 105102 | FBgn0260799 | p120ctn   | 17484 |
| FBgn0004055 | uzip       | 104208 | FBgn0037377 | CG1218    | 1218  |
| FBgn0028379 | fan        | 106149 | FBgn0037472 | CG10098   | 10098 |
| FBgn0036160 | CG12289    | 105685 | FBgn0040235 | c12.1     | 12135 |
| FBgn0016059 | Sema-1b    | 107233 | FBgn0032729 | CG10639   | 10639 |
| FBgn0034367 | sec6       | 105836 | FBgn0033609 | fbl6      | 13213 |
| FBgn0040377 | Vha36-3    | 104048 | FBgn0004657 | mys       | 1560  |
| FBgn0040297 | Nhe2       | 106053 | FBgn0039188 | Golgin84  | 17785 |
| FBgn0086899 | tlk        | 105732 | FBgn0029712 | CG15912   | 15912 |
| FBgn0004907 | 14-3-3zeta | 104496 | FBgn0035150 | Rev1      | 12189 |
| FBgn0052036 | CG32036    | 106434 | FBgn0020497 | emb       | 13387 |
| FBgn0034730 | ppk12      | 105131 | FBgn0037241 | CG14646   | 14646 |
| FBgn0032915 | CG12050    | 103935 | FBgn0050342 | Prp38     | 30342 |
| FBgn0004654 | Pgd        | 100269 | FBgn0030611 | CG15027   | 15027 |
| FBgn0262617 | CG43143    | 106088 | FBgn0034299 | CG5757    | 5757  |

|             |           |        |             |          |       |
|-------------|-----------|--------|-------------|----------|-------|
| FBgn0053555 | btsz      | 102608 | FBgn0030346 | CG11802  | 11802 |
| FBgn0039048 | CG17111   | 107290 | FBgn0001235 | hth      | 17117 |
| FBgn0000723 | Fps85D    | 107266 | FBgn0037084 | Syx6     | 7736  |
| FBgn0260964 | Vmat      | 104072 | FBgn0033883 | CG16935  | 16935 |
| FBgn0039132 | AP-1sigma | 107322 | FBgn0262127 | kibra    | 33967 |
| FBgn0004959 | phm       | 108359 | FBgn0003651 | svp      | 11502 |
| FBgn0039254 | Nmnat     | 107262 | FBgn0066101 | LpR1     | 31094 |
| FBgn0045479 | Gr64a     | 103342 | FBgn0031033 | CG14219  | 14219 |
| FBgn0035107 | mri       | 101345 | FBgn0020369 | Pros45   | 1489  |
| FBgn0022338 | dnk       | 103385 | FBgn0030678 | CG11679  | 11679 |
| FBgn0022708 | Adk2      | 107326 | FBgn0036643 | Syx8     | 4109  |
| FBgn0086736 | GckIII    | 107158 | FBgn0039188 | Golgin84 | 17785 |
| FBgn0031634 | Ir25a     | 106731 | FBgn0034389 | Mctp     | 15078 |
| FBgn0036875 | CG9449    | 102991 | FBgn0039654 | Brd8     | 14514 |
| FBgn0025640 | CG13369   | 100747 | FBgn0031611 | CG17840  | 17840 |
| FBgn0015765 | Mpk2      | 102484 | FBgn0037135 | CG7414   | 7414  |
| FBgn0032673 | CG7180    | 102397 | FBgn0035374 | mRpS35   | 2101  |
| FBgn0016696 | Pitslre   | 107303 | FBgn0038662 | CG14290  | 14290 |
| FBgn0085390 | Dgk       | 105753 | FBgn0028476 | CG15817  | 15817 |
| FBgn0004842 | NepYr     | 103973 | FBgn0031858 | CG17378  | 17378 |
| FBgn0030661 | CG8105    | 104510 | FBgn0035236 | CG12004  | 12004 |
| FBgn0031643 | CG3008    | 103828 | FBgn0035165 | CG13887  | 13887 |
| FBgn0036552 | CG17028   | 100100 | FBgn0031170 | CG1718   | 1718  |
| FBgn0038446 | CG14903   | 105752 | FBgn0046214 | vig2     | 11844 |
| FBgn0030976 | CG7378    | 106098 | FBgn0025701 | CG14709  | 14709 |
| FBgn0017558 | Pdk       | 106641 | FBgn0261862 | whd      | 12891 |
| FBgn0005536 | Mbs       | 105762 | FBgn0042134 | Capr     | 18811 |
| FBgn0033021 | CG10417   | 106180 | FBgn0032054 | CG13090  | 13090 |
| FBgn0003731 | Egfr      | 107130 | FBgn0025637 | skpA     | 16983 |
| FBgn0026370 | SRPK      | 103416 | FBgn0033775 | Cyp9h1   | 17577 |
| FBgn0028997 | nmdyn-D7  | 105161 | FBgn0036210 | CG14130  | 14130 |
| FBgn0035620 | CG5150    | 102646 | FBgn0003277 | RpII215  | 1554  |
| FBgn0028689 | Rpn6      | 103942 | FBgn0019686 | lok      | 10895 |
| FBgn0010355 | Taf1      | 106119 | FBgn0250814 | CG4169   | 4169  |
| FBgn0010269 | Dsor1     | 107276 | FBgn0052703 | CG32703  | 32703 |
| FBgn0263237 | Cdk7      | 103413 | FBgn0025936 | Eph      | 1511  |
| FBgn0003744 | trc       | 107923 | FBgn0045866 | bai      | 11785 |
| FBgn0025642 | CG32812   | 104081 | FBgn0001084 | fy       | 13396 |
| FBgn0038903 | RpI12     | 105758 | FBgn0261278 | grp      | 17161 |
| FBgn0032910 | CG9265    | 102456 | FBgn0010341 | Cdc42    | 12530 |
| FBgn0019948 | Phm       | 104028 | FBgn0038167 | lkb1     | 9374  |
| FBgn0086372 | lap       | 105767 | FBgn0038814 | CG15923  | 15923 |
| FBgn0062449 | CG13197   | 105122 | FBgn0013987 | MAPk-Ak2 | 3086  |
| FBgn0004107 | cdc2c     | 104959 | FBgn0032242 | CG5355   | 5355  |
| FBgn0020261 | pcm       | 105739 | FBgn0019624 | CoVa     | 14724 |
| FBgn0015295 | shark     | 105706 | FBgn0029941 | CG1677   | 1677  |
| FBgn0030697 | CG8565    | 100449 | FBgn0039849 | CG11334  | 11334 |
| FBgn0261285 | Ppcs      | 103831 | FBgn0032216 | CG5384   | 5384  |
| FBgn0035039 | CG3608    | 106695 | FBgn0032701 | CG10341  | 10341 |
| FBgn0038856 | sec15     | 105126 | FBgn0032690 | CG10333  | 10333 |
| FBgn0037341 | CG12746   | 104989 | FBgn0022344 | CG10340  | 10340 |

|             |         |        |             |           |       |
|-------------|---------|--------|-------------|-----------|-------|
| FBgn0032752 | CG10702 | 100842 | FBgn0015558 | tty       | 1693  |
| FBgn0039083 | CG10177 | 107848 | FBgn0026760 | Tehao     | 7121  |
| FBgn0004106 | cdc2    | 106130 | FBgn0002044 | swm       | 10084 |
| FBgn0052666 | Drak    | 107263 | FBgn0036317 | CG10948   | 10948 |
| FBgn0031381 | Npc2a   | 106771 | FBgn0037215 | CG12582   | 12582 |
| FBgn0011770 | Gip     | 105750 | FBgn0033526 | Caf1-105  | 12892 |
| FBgn0037950 | HisCl1  | 104966 | FBgn0041342 | Cct1      | 1049  |
| FBgn0039675 | ppk21   | 107892 | FBgn0016756 | Ubp64E    | 5486  |
| FBgn0003716 | tkv     | 105834 | FBgn0000499 | dsh       | 18361 |
| FBgn0005778 | PpD5    | 104452 | FBgn0031260 | Spp       | 11840 |
| FBgn0035445 | CG12014 | 13990  | FBgn0062442 | CG1458    | 1458  |
| FBgn0027783 | SMC2    | 10212  | FBgn0010357 | betaTry   | 18211 |
| FBgn0028687 | Rpt1    | 1341   | FBgn0025391 | Scgdelta  | 14808 |
| FBgn0011708 | Syx5    | 4214   | FBgn0023175 | Prosalph7 | 1519  |
| FBgn0026400 | Noa36   | 10009  | FBgn0035245 | GC        | 13927 |
| FBgn0000318 | cl      | 11024  | FBgn0031043 | CG14222   | 14222 |
| FBgn0004179 | Csp     | 6395   | FBgn0030407 | CG2543    | 2543  |
| FBgn0033812 | pex13   | 4663   | FBgn0037383 | CG2023    | 2023  |
| FBgn0036813 | Aut1    | 6877   | FBgn0039734 | Tace      | 7908  |
| FBgn0032210 | CYLD    | 5603   | FBgn0002891 | mus205    | 1925  |
| FBgn0029761 | SK      | 10706  | FBgn0051368 | CG31368   | 31368 |
| FBgn0263198 | Acn     | 10473  | FBgn0031897 | CG13784   | 13784 |
| FBgn0034500 | CG11200 | 11200  | FBgn0033656 | S2P       | 8988  |
| FBgn0036918 | CG7770  | 7770   | FBgn0031397 | CG15385   | 15385 |
| FBgn0010583 | dock    | 3727   | FBgn0037327 | PEK       | 2087  |
| FBgn0038088 | CG10126 | 10126  | FBgn0029594 | CG14806   | 14806 |
| FBgn0034479 | CG8654  | 8654   | FBgn0033661 | CG13185   | 13185 |
| FBgn0033452 | CG1599  | 1599   | FBgn0030701 | CG16952   | 16952 |
| FBgn0261243 | Psa     | 1009   | FBgn0039855 | CG1638    | 1638  |
| FBgn0002638 | Bj1     | 10480  | FBgn0033428 | Updo      | 1818  |
| FBgn0034427 | CG10474 | 10474  | FBgn0039235 | CG10899   | 10899 |
| FBgn0011715 | Snr1    | 1064   | FBgn0024728 | Slip1     | 1783  |
| FBgn0035517 | CG1265  | 1265   | FBgn0030889 | CG15373   | 15373 |
| FBgn0050389 | CG30389 | 30389  | FBgn0025549 | unc-119   | 1659  |
| FBgn0035290 | CG1887  | 1887   | FBgn0027780 | U26       | 13401 |
| FBgn0004868 | Gdi     | 4422   | FBgn0002021 | l(2)37Bb  | 10655 |
| FBgn0261274 | Ero1L   | 1333   | FBgn0033500 | CG12913   | 12913 |
| FBgn0011692 | pav     | 1258   | FBgn0023514 | CG14805   | 14805 |
| FBgn0002022 | Catsup  | 10449  | FBgn0032382 | Mal-B2    | 14935 |
| FBgn0027562 | CG10345 | 10345  | FBgn0033523 | CG12895   | 12895 |
| FBgn0039094 | CG10184 | 10184  | FBgn0053156 | CG33156   | 33156 |
| FBgn0033890 | Ctf4    | 13350  | FBgn0038595 | CG7142    | 7142  |
| FBgn0034451 | CG11242 | 11242  | FBgn0032295 | CG12299   | 12299 |
| FBgn0035436 | CG12016 | 12016  | FBgn0039093 | CG10183   | 10183 |
| FBgn0000535 | eag     | 10952  | FBgn0036537 | CG18081   | 18081 |
| FBgn0035603 | CG10635 | 10635  | FBgn0000147 | aur       | 3068  |
| FBgn0034382 | CG18609 | 18609  | FBgn0033610 | CG18335   | 18335 |
| FBgn0035501 | CG1299  | 1299   | FBgn0037660 | CG18005   | 18005 |
| FBgn0027552 | CG10863 | 10863  | FBgn0028658 | adat      | 16889 |
| FBgn0027615 | CG6404  | 6404   | FBgn0039869 | CG1890    | 1890  |
| FBgn0034307 | CG10914 | 10914  | FBgn0033853 | CG6145    | 6145  |

|             |           |       |             |             |       |
|-------------|-----------|-------|-------------|-------------|-------|
| FBgn0037377 | CG1218    | 1218  | FBgn0003321 | sbr         | 1664  |
| FBgn0038720 | CG6231    | 6231  | FBgn0032724 | CG10428     | 10428 |
| FBgn0052262 | CG32262   | 32262 | FBgn0039135 | CG13603     | 13603 |
| FBgn0034654 | CG10306   | 10306 | FBgn0038135 | CG8773      | 8773  |
| FBgn0033886 | CG13349   | 13349 | FBgn0026777 | Rad23       | 1836  |
| FBgn0034688 | CG11474   | 11474 | FBgn0023535 | arg         | 18104 |
| FBgn0000330 | cm        | 3035  | FBgn0030151 | CG1354      | 1354  |
| FBgn0033246 | ACC       | 11198 | FBgn0004360 | Wnt2        | 1916  |
| FBgn0032444 | CG5525    | 5525  | FBgn0036336 | ste14       | 11268 |
| FBgn0037051 | CG10565   | 10565 | FBgn0051619 | CG31619     | 31619 |
| FBgn0052250 | CG32250   | 32250 | FBgn0035679 | CG10467     | 10467 |
| FBgn0041194 | Prat2     | 10078 | FBgn0027872 | rdgBbeta    | 17818 |
| FBgn0037777 | CG11722   | 11722 | FBgn0027083 | Aats-met    | 31322 |
| FBgn0043012 | AP-2sigma | 6056  | FBgn0000316 | cin         | 2945  |
| FBgn0025680 | cry       | 3772  | FBgn0036286 | CG10616     | 10616 |
| FBgn0262476 | CG43066   | 5226  | FBgn0032052 | CG13089     | 13089 |
| FBgn0036919 | Grasp65   | 7809  | FBgn0003204 | ras         | 1799  |
| FBgn0003731 | Egfr      | 10079 | FBgn0033540 | Elp2        | 11887 |
| FBgn0011764 | Dsp1      | 12223 | FBgn0023181 | Orc4        | 2917  |
| FBgn0038195 | CG3061    | 3061  | FBgn0052944 | CG32944     | 32944 |
| FBgn0020766 | Aats-phe  | 13348 | FBgn0034858 | eIF2B-delta | 10315 |
| FBgn0034611 | CG10069   | 10069 | FBgn0035141 | Cypl        | 13892 |
| FBgn0035476 | CG12766   | 12766 | FBgn0038453 | CG10326     | 10326 |
| FBgn0004587 | B52       | 10851 | FBgn0037108 | CG11306     | 11306 |
| FBgn0038923 | mRpL35    | 13410 | FBgn0032744 | CG15173     | 15173 |
| FBgn0036702 | CG6512    | 6512  | FBgn0030063 | CG1789      | 1789  |
| FBgn0015790 | Rab11     | 5771  | FBgn0037312 | CG11999     | 11999 |
| FBgn0034732 | CG3701    | 3701  | FBgn0033507 | CG12909     | 12909 |
| FBgn0004057 | Zw        | 12529 | FBgn0261882 | l(2)35Bc    | 4103  |
| FBgn0037882 | CG17187   | 17187 | FBgn0033451 | CG1665      | 1665  |
| FBgn0086657 | ik2       | 2615  | FBgn0039637 | CG11880     | 11880 |
| FBgn0033962 | CG10153   | 10153 | FBgn0031107 | HERC2       | 11734 |
| FBgn0010709 | Atg6      | 5429  | FBgn0010265 | RpS13       | 13389 |
| FBgn0036341 | Syx13     | 11278 | FBgn0031263 | CG2789      | 2789  |
| FBgn0024980 | Syx4      | 2715  | FBgn0039172 | Spase22-23  | 5677  |
| FBgn0261574 | kug       | 7749  | FBgn0050062 | CG30062     | 30062 |
| FBgn0037765 | CG9458    | 9458  | FBgn0004390 | Gap1        | 6721  |
| FBgn0003716 | tkv       | 14026 | FBgn0026876 | CG11403     | 11403 |
| FBgn0036505 | CG7945    | 7945  | FBgn0031116 | CG1695      | 1695  |
| FBgn0003654 | sw        | 18000 | FBgn0031659 | CG14043     | 14043 |
| FBgn0038617 | CG12333   | 12333 | FBgn0004573 | 5-HT7       | 12073 |
| FBgn0053208 | Mical     | 33208 | FBgn0024289 | Sodh-1      | 1982  |
| FBgn0034649 | CG9865    | 9865  | FBgn0030362 | regucalcin  | 1803  |
| FBgn0262907 | rdx       | 12537 | FBgn0001085 | fz          | 17697 |
| FBgn0003896 | tup       | 10619 | FBgn0040228 | dyn-p25     | 10846 |
| FBgn0087005 | rtp       | 10233 | FBgn0029067 | l(1)G0269   | 1696  |
| FBgn0038542 | CG7431    | 7431  | FBgn0030687 | CG17209     | 17209 |
| FBgn0035462 | CG1120    | 1120  | FBgn0003429 | slo         | 10693 |
| FBgn0020503 | CLIP-190  | 5020  | FBgn0040347 | mus81       | 3026  |
| FBgn0027558 | pgant3    | 4445  | FBgn0033259 | CG11210     | 11210 |
| FBgn0043458 | CG12084   | 12084 | FBgn0015032 | Cyp4c3      | 1438  |

|             |           |       |             |           |       |
|-------------|-----------|-------|-------------|-----------|-------|
| FBgn0034392 | CG15094   | 15094 | FBgn0035122 | mRpL17    | 13880 |
| FBgn0003731 | Egfr      | 10079 | FBgn0036277 | CG10418   | 10418 |
| FBgn0038641 | CG7708    | 7708  | FBgn0000578 | ena       | 15112 |
| FBgn0030366 | Usp7      | 1490  | FBgn0037713 | CG16790   | 16790 |
| FBgn0033996 | CG11807   | 11807 | FBgn0033905 | CG18324   | 18324 |
| FBgn0035526 | CG1316    | 1316  | FBgn0027580 | CG1516    | 1516  |
| FBgn0004379 | Klp67A    | 10923 | FBgn0261642 | mbl       | 33197 |
| FBgn0011742 | Arp14D    | 9901  | FBgn0035321 | CG1275    | 1275  |
| FBgn0034697 | GM130     | 11061 | FBgn0030479 | Rbp1-like | 1987  |
| FBgn0050035 | Tret1-1   | 30035 | FBgn0040259 | Ugt86Da   | 18578 |
| FBgn0001624 | dlg1      | 1725  | FBgn0031868 | Rat1      | 10354 |
| FBgn0036043 | CG8177    | 8177  | FBgn0039620 | CG1443    | 1443  |
| FBgn0028341 | l(1)G0232 | 32697 | FBgn0030457 | CG12096   | 12096 |
| FBgn0262907 | rdx       | 12537 | FBgn0262126 | gho       | 10882 |
| FBgn0028434 | Ercc1     | 10215 | FBgn0030403 | CG1824    | 1824  |
| FBgn0023388 | Dap160    | 1099  | FBgn0005648 | Pabp2     | 2163  |
| FBgn0004167 | kst       | 12008 | FBgn0034410 | Topors    | 15104 |
| FBgn0037391 | CG2017    | 2017  | FBgn0039110 | RanBP3    | 10225 |
| FBgn0035060 | Eps-15    | 16932 | FBgn0011725 | twin      | 31137 |
| FBgn0011286 | Rya-r44F  | 10844 | FBgn0035411 | Girdin    | 12734 |
| FBgn0046296 | CG11534   | 11534 | FBgn0034176 | ste24a    | 9000  |
| FBgn0011224 | heph      | 31000 | FBgn0030327 | FucT6     | 2448  |
| FBgn0032782 | Rab9      | 9994  | FBgn0039844 | CG1607    | 1607  |
| FBgn0031853 | TLL3B     | 11201 | FBgn0038531 | CG14325   | 14325 |
| FBgn0261574 | kug       | 7749  | FBgn0033665 | CG13189   | 13189 |
| FBgn0020496 | CtBP      | 7583  | FBgn0039300 | RpS27     | 10423 |
| FBgn0035969 | CG4476    | 4476  | FBgn0031544 | CG17593   | 17593 |
| FBgn0010709 | Atg6      | 5429  | FBgn0263113 | CG43370   | 18631 |
| FBgn0000044 | Act57B    | 10067 | FBgn0030778 | CG4678    | 4678  |
| FBgn0001319 | kn        | 10197 | FBgn0010329 | Tbh       | 1543  |
| FBgn0028411 | Nxt1      | 12752 | FBgn0262127 | kibra     | 33967 |
| FBgn0034356 | CG10924   | 10924 | FBgn0037369 | CG2100    | 2100  |
| FBgn0034882 | CG5398    | 5398  | FBgn0035416 | gry       | 17569 |
| FBgn0013770 | Cp1       | 6692  | FBgn0023179 | amon      | 6438  |
| FBgn0000405 | CycB      | 3510  | FBgn0025825 | Hdac3     | 2128  |
| FBgn0036257 | RhoGAP68F | 6811  | FBgn0020764 | Alas      | 3017  |
| FBgn0032782 | Rab9      | 9994  | FBgn0050077 | blos1     | 30077 |
| FBgn0000346 | comt      | 1618  | FBgn0030529 | Clic      | 10997 |
| FBgn0039296 | CG10420   | 10420 | FBgn0052473 | CG32473   | 32473 |
| FBgn0052054 | CG32054   | 32054 | FBgn0050011 | gem       | 30011 |
| FBgn0036813 | Aut1      | 6877  | FBgn0037653 | CG11982   | 11982 |
| FBgn0019938 | RpI1      | 10122 | FBgn0260780 | wisp      | 15737 |
| FBgn0032782 | Rab9      | 9994  | FBgn0024973 | CG2701    | 2701  |
| FBgn0040334 | Tsp3A     | 10742 | FBgn0030739 | CG13957   | 13957 |
| FBgn0000319 | Chc       | 9012  | FBgn0031186 | CG14614   | 14614 |
| FBgn0033958 | CG12858   | 12858 | FBgn0030506 | Lig4      | 12176 |
| FBgn0052263 | CG32263   | 32263 | FBgn0026879 | CG13364   | 13364 |
| FBgn0027505 | rab3-GAP  | 7061  | FBgn0036462 | mRpL39    | 17166 |
| FBgn0260945 | Atg1      | 10967 | FBgn0010548 | Aldh-III  | 11140 |
| FBgn0010709 | Atg6      | 5429  | FBgn0038428 | CG14894   | 14894 |
| FBgn0003716 | tkv       | 14026 | FBgn0024294 | Spn43Aa   | 12172 |

|             |           |       |             |              |       |
|-------------|-----------|-------|-------------|--------------|-------|
| FBgn0011739 | wts       | 12072 | FBgn0039831 | CG12054      | 12054 |
| FBgn0000319 | Chc       | 9012  | FBgn0028436 | ECSIT        | 10610 |
| FBgn0034045 | CG8249    | 8249  | FBgn0262169 | magu         | 2264  |
| FBgn0037707 | RnpS1     | 16788 | FBgn0045759 | bin          | 18647 |
| FBgn0038716 | CG7342    | 7342  | FBgn0033474 | CG1407       | 1407  |
| FBgn0034231 | Apc10     | 11419 | FBgn0000409 | Cyt-c-p      | 17903 |
| FBgn0014010 | Rab5      | 3664  | FBgn0004374 | neb          | 10718 |
| FBgn0263110 | CG43367   | 1332  | FBgn0037432 | CG10298      | 10298 |
| FBgn0033538 | CG11883   | 11883 | FBgn0052451 | SPoCk        | 32451 |
| FBgn0015790 | Rab11     | 5771  | FBgn0013972 | Gycalpa99B   | 1912  |
| FBgn0039227 | polybromo | 11375 | FBgn0036789 | AICR2        | 13702 |
| FBgn0032782 | Rab9      | 9994  | FBgn0035489 | Rcd5         | 1135  |
| FBgn0029664 | CG10802   | 10802 | FBgn0004380 | Klp64D       | 10642 |
| FBgn0038715 | CG7333    | 7333  | FBgn0261394 | Pros29       | 9327  |
| FBgn0026259 | eIF5B     | 10840 | FBgn0016919 | nompB        | 12548 |
| FBgn0034539 | CG11159   | 11159 | FBgn0034567 | CG15651      | 15651 |
| FBgn0029943 | Atg5      | 1643  | FBgn0050349 | CG30349      | 30349 |
| FBgn0036671 | CG9951    | 9951  | FBgn0036338 | CG11253      | 11253 |
| FBgn0034368 | CG5482    | 5482  | FBgn0040629 | CG18673      | 18673 |
| FBgn0003256 | rl        | 12559 | FBgn0050104 | CG30104      | 30104 |
| FBgn0004885 | tok       | 6863  | FBgn0039936 | CG11148      | 11148 |
| FBgn0034383 | CG17821   | 17821 | FBgn0033316 | CG14749      | 14749 |
| FBgn0263251 | vnc       | 11989 | FBgn0035577 | CG13708      | 13708 |
| FBgn0041147 | ida       | 10850 | FBgn0031500 | CG17221      | 17221 |
| FBgn0032393 | CG12264   | 12264 | FBgn0052808 | CG32808      | 32808 |
| FBgn0039702 | Vps16B    | 18112 | FBgn0029858 | CG15896      | 15896 |
| FBgn0027594 | drpr      | 2086  | FBgn0033556 | CG12343      | 12343 |
| FBgn0034883 | CG17664   | 17664 | FBgn0025800 | Smox         | 2262  |
| FBgn0035483 | CG1134    | 1134  | FBgn0039091 | CG10182      | 10182 |
| FBgn0034535 | CG11110   | 11110 | FBgn0052155 | CG32155      | 32155 |
| FBgn0034109 | CG7747    | 7747  | FBgn0029976 | snz          | 1514  |
| FBgn0030086 | CG7033    | 7033  | FBgn0035704 | CG10144      | 10144 |
| FBgn0035944 | CG5021    | 5021  | FBgn0038437 | CG14898      | 14898 |
| FBgn0019960 | CG6455    | 6455  | FBgn0037659 | Kdm2         | 11033 |
| FBgn0003475 | spir      | 10076 | FBgn0260858 | Ykt6         | 1515  |
| FBgn0002023 | Lim3      | 10699 | FBgn0046704 | Liprin-alpha | 11199 |
| FBgn0034381 | List      | 15088 | FBgn0031716 | CG14015      | 14015 |
| FBgn0037764 | CG9459    | 9459  | FBgn0051040 | Cog7         | 31040 |
| FBgn0004370 | Ptp10D    | 1817  | FBgn0026741 | mRpL18       | 12373 |
| FBgn0034481 | CG11041   | 11041 | FBgn0031231 | mRpL10       | 11488 |
| FBgn0003256 | rl        | 12559 | FBgn0030329 | prtp         | 1837  |
| FBgn0038690 | CG11703   | 11703 | FBgn0030321 | CG1703       | 1703  |
| FBgn0086356 | tum       | 13345 | FBgn0035640 | mad2         | 17498 |
| FBgn0021760 | chb       | 32435 | FBgn0050372 | CG30372      | 30372 |
| FBgn0036415 | CG7768    | 7768  | FBgn0024998 | CG2685       | 2685  |
| FBgn0031256 | CG4164    | 4164  | FBgn0037045 | CG10584      | 10584 |
| FBgn0033882 | CG13343   | 13343 | FBgn0037465 | CG1105       | 1105  |
| FBgn0003206 | Ras64B    | 1167  | FBgn0040337 | CG3021       | 3021  |
| FBgn0015797 | Rab6      | 6601  | FBgn0015282 | Pros26.4     | 5289  |
| FBgn0033089 | CG17266   | 17266 | FBgn0032644 | CG5131       | 5131  |
| FBgn0038590 | CG12320   | 12320 | FBgn0051232 | koko         | 31232 |

|             |            |       |             |                |       |
|-------------|------------|-------|-------------|----------------|-------|
| FBgn0035392 | CG1271     | 1271  | FBgn0260936 | scny           | 5505  |
| FBgn0038539 | Atg8b      | 12334 | FBgn0031537 | sec5           | 8843  |
| FBgn0036671 | CG9951     | 9951  | FBgn0025109 | Bem46          | 18642 |
| FBgn0033933 | CG10104    | 10104 | FBgn0033169 | CG11123        | 11123 |
| FBgn0031720 | CG14013    | 14013 | FBgn0012051 | CalpA          | 7563  |
| FBgn0036207 | CG10907    | 10907 | FBgn0010222 | Nmdmc          | 18466 |
| FBgn0030230 | Rph        | 11556 | FBgn0034661 | CG4386         | 4386  |
| FBgn0000166 | bcd        | 1034  | FBgn0030349 | CG10353        | 10353 |
| FBgn0035520 | CG11586    | 11586 | FBgn0039212 | Syx18          | 13626 |
| FBgn0035090 | CG2736     | 2736  | FBgn0032595 | CG17996        | 17996 |
| FBgn0034885 | CG4019     | 4019  | FBgn0050390 | Sgf29          | 30390 |
| FBgn0261041 | stj        | 12295 | FBgn0050499 | CG30499        | 30499 |
| FBgn0013751 | Awh        | 1072  | FBgn0040964 | CG18661        | 18661 |
| FBgn0052053 | CG32053    | 32053 | FBgn0003517 | sta            | 14792 |
| FBgn0032618 | CG31743    | 31743 | FBgn0039084 | CG10175        | 10175 |
| FBgn0033342 | CG8258     | 8258  | FBgn0026749 | Yippee         | 1989  |
| FBgn0250789 | alpha-Spec | 1977  | FBgn0030522 | CG11103        | 11103 |
| FBgn0020440 | Fak56D     | 10023 | FBgn0034367 | sec6           | 5341  |
| FBgn0029688 | lva        | 6450  | FBgn0023023 | CRMP           | 1411  |
| FBgn0034722 | Rtf1       | 10955 | FBgn0030276 | Dlic           | 1938  |
| FBgn0039212 | Syx18      | 13626 | FBgn0260944 | Rbp1           | 17136 |
| FBgn0003256 | rl         | 12559 | FBgn0031473 | CG3104         | 3104  |
| FBgn0086377 | Syx7       | 5081  | FBgn0261953 | AP-2           | 7807  |
| FBgn0038718 | CG17752    | 17752 | FBgn0010638 | Sec61beta      | 10130 |
| FBgn0033830 | CG10814    | 10814 | FBgn0015520 | nonA-1         | 10328 |
| FBgn0019650 | toy        | 11186 | FBgn0040309 | Jafrac1        | 1633  |
| FBgn0033527 | CG11777    | 11777 | FBgn0027548 | nito           | 2910  |
| FBgn0037930 | CG14715    | 14715 | FBgn0030183 | CG15309        | 15309 |
| FBgn0001233 | Hsp83      | 1242  | FBgn0003141 | pr             | 16784 |
| FBgn0034487 | CG11048    | 11048 | FBgn0031099 | CG17065        | 17065 |
| FBgn0014010 | Rab5       | 3664  | FBgn0035348 | CG16758        | 16758 |
| FBgn0030377 | CG1924     | 1924  | FBgn0033714 | garz           | 8487  |
| FBgn0259979 | CG17337    | 17337 | FBgn0033473 | CG12128        | 12128 |
| FBgn0034612 | CG10505    | 10505 | FBgn0033170 | sPLA2          | 11124 |
| FBgn0016070 | smg        | 5263  | FBgn0036999 | CG5976         | 5976  |
| FBgn0035815 | Snmp2      | 7422  | FBgn0042138 | CG18815        | 18815 |
| FBgn0030990 | CG7556     | 7556  | FBgn0032821 | CdGAPr         | 10538 |
| FBgn0038740 | CG4562     | 4562  | FBgn0039634 | CG11874        | 11874 |
| FBgn0035027 | CG3511     | 3511  | FBgn0050268 | CG30268        | 30268 |
| FBgn0038719 | CG16727    | 16727 | FBgn0000320 | eya            | 9554  |
| FBgn0004242 | Syt1       | 3139  | FBgn0035581 | CG17150        | 17150 |
| FBgn0053696 | CG33696    | 33696 | FBgn0039272 | CG11836        | 11836 |
| FBgn0001258 | ImpL3      | 10160 | FBgn0033557 | CG12325        | 12325 |
| FBgn0029819 | CG3016     | 3016  | FBgn0037262 | MED31          | 1057  |
| FBgn0010235 | Klc        | 5433  | FBgn0024891 | ferrochelatase | 2098  |
| FBgn0040805 | CG12355    | 12355 | FBgn0039691 | CG1972         | 1972  |
| FBgn0010235 | Klc        | 5433  | FBgn0031048 | CG12237        | 12237 |
| FBgn0038796 | CG10881    | 10881 | FBgn0001247 | Ide            | 5517  |
| FBgn0026318 | Traf6      | 10961 | FBgn0034402 | CG15084        | 15084 |
| FBgn0052226 | CG32226    | 32226 | FBgn0033162 | CG1707         | 1707  |
| FBgn0034156 | CG5348     | 5348  | FBgn0019925 | Surf4          | 6202  |

|             |         |       |             |             |       |
|-------------|---------|-------|-------------|-------------|-------|
| FBgn0263106 | DnaJ-1  | 10578 | FBgn0026565 | CG1315      | 1315  |
| FBgn0020269 | mspo    | 10145 | FBgn0262166 | calypso     | 8445  |
| FBgn0036571 | CG12272 | 12272 | FBgn0030311 | CG11699     | 11699 |
| FBgn0004638 | drk     | 6033  | FBgn0037061 | CG12975     | 12975 |
| FBgn0033899 | CG13016 | 13016 | FBgn0029118 | Suchb       | 10622 |
| FBgn0013948 | Eip93F  | 18389 | FBgn0034877 | levy        | 17280 |
| FBgn0038938 | CG7084  | 7084  | FBgn0028292 | ric8a       | 15797 |
| FBgn0000028 | acj6    | 9151  | FBgn0037356 | CG12170     | 12170 |
| FBgn0024371 | E2f2    | 1071  | FBgn0033524 | Cyp49a1     | 18377 |
| FBgn0033326 | CG14743 | 14743 | FBgn0035909 | ergic53     | 6822  |
| FBgn0031074 | skpE    | 11942 | FBgn0037037 | CG10588     | 10588 |
| FBgn0011760 | ctp     | 6998  | FBgn0032168 | CG13126     | 13126 |
| FBgn0038414 | CG6901  | 6901  | FBgn0033216 | CG1946      | 1946  |
| FBgn0036671 | CG9951  | 9951  | FBgn0024836 | stan        | 11895 |
| FBgn0034577 | cpa     | 10540 | FBgn0010382 | CycE        | 3938  |
| FBgn0034956 | CG4324  | 4324  | FBgn0030178 | CG2974      | 2974  |
| FBgn0038828 | CG17270 | 17270 | FBgn0033916 | CG8494      | 8494  |
| FBgn0039588 | CG12413 | 12413 | FBgn0023537 | CG17896     | 17896 |
| FBgn0014455 | Ahcy13  | 11654 | FBgn0036309 | Hip1        | 10971 |
| FBgn0036536 | CG12713 | 12713 | FBgn0003742 | tra2        | 10128 |
| FBgn0011230 | poe     | 14472 | FBgn0036889 | CG14100     | 14100 |
| FBgn0036461 | CG10006 | 10006 | FBgn0041775 | tral        | 10686 |
| FBgn0034636 | CG10440 | 10440 | FBgn0039407 | CG14544     | 14544 |
| FBgn0036255 | Atg12   | 10861 | FBgn0037236 | CG9772      | 9772  |
| FBgn0036580 | PDCD-5  | 13072 | FBgn0261881 | l(2)35Be    | 4140  |
| FBgn0034626 | CG10795 | 10795 | FBgn0035232 | CG12099     | 12099 |
| FBgn0032451 | spict   | 12292 | FBgn0010282 | TfIIIFalpha | 10281 |
| FBgn0035397 | CG11486 | 11486 | FBgn0032731 | CG10641     | 10641 |
| FBgn0003301 | rut     | 9533  | FBgn0032378 | CycY        | 14939 |
| FBgn0034168 | CG15614 | 15614 | FBgn0039966 | Rab21       | 17515 |
| FBgn0002787 | Mov34   | 3416  | FBgn0042125 | CG18787     | 18787 |
| FBgn0034665 | CG4372  | 4372  | FBgn0039669 | CG2014      | 2014  |
| FBgn0261574 | kug     | 7749  | FBgn0027936 | vih         | 10682 |
| FBgn0011648 | Mad     | 12399 | FBgn0035473 | mge         | 14981 |
| FBgn0035519 | CG1309  | 1309  | FBgn0262115 | CG17683     | 17683 |
| FBgn0034494 | CG10444 | 10444 | FBgn0033187 | CG2144      | 2144  |
| FBgn0033495 | CG12214 | 12214 | FBgn0037473 | CG10068     | 10068 |
| FBgn0034959 | CG11388 | 11388 | FBgn0033784 | CG13322     | 13322 |
| FBgn0003256 | rl      | 12559 | FBgn0051184 | LSm3        | 31184 |
| FBgn0004167 | kst     | 12008 | FBgn0043362 | bchs        | 14001 |
| FBgn0000482 | dor     | 3093  | FBgn0010352 | Nc73EF      | 11661 |
| FBgn0026175 | skpC    | 11941 | FBgn0033836 | CG18278     | 18278 |
| FBgn0026174 | skpD    | 12700 | FBgn0039727 | CG15523     | 15523 |
| FBgn0025595 | GRHR    | 11325 | FBgn0031021 | CG12203     | 12203 |
| FBgn0038201 | CG9918  | 9918  | FBgn0039170 | CG13609     | 13609 |
| FBgn0034247 | CG6484  | 6484  | FBgn0000150 | awd         | 2210  |
| FBgn0036671 | CG9951  | 9951  | FBgn0086475 | sec3        | 3885  |
| FBgn0031697 | CG14024 | 14024 | FBgn0030683 | CG8239      | 8239  |
| FBgn0027594 | drpr    | 2086  | FBgn0010303 | hep         | 4353  |
| FBgn0002284 | Pros26  | 4097  | FBgn0031865 | Nha1        | 10806 |
| FBgn0036099 | CG11811 | 11811 | FBgn0000320 | eya         | 9554  |



|             |                   |       |             |           |       |
|-------------|-------------------|-------|-------------|-----------|-------|
| FBgn0035091 | CG3829            | 3829  | FBgn0050122 | CG30122   | 30122 |
| FBgn0000479 | dnc               | 32498 | FBgn0020412 | JIL-1     | 6297  |
| FBgn0039702 | Vps16B            | 18112 | FBgn0038960 | CG13855   | 13855 |
| FBgn0030141 | Gga               | 3002  | FBgn0038438 | Der-2     | 14899 |
| FBgn0050051 | CG30051           | 30051 | FBgn0029665 | CG14270   | 14270 |
| FBgn0039830 | CG1746            | 1746  | FBgn0039304 | CG10425   | 10425 |
| FBgn0023477 | Tal               | 2827  | FBgn0086707 | ncm       | 12750 |
| FBgn0042098 | CG18735           | 18735 | FBgn0032144 | CG17633   | 17633 |
| FBgn0031377 | CG15356           | 15356 | FBgn0027279 | l(1)G0196 | 14616 |
| FBgn0000394 | cv                | 12410 | FBgn0036962 | CG17122   | 17122 |
| FBgn0003638 | su(w[a])          | 3019  | FBgn0036271 | Pbgs      | 10335 |
| FBgn0032822 | CG10466           | 10466 | FBgn0039159 | mRpS24    | 13608 |
| FBgn0051352 | Unc-115a          | 31352 | FBgn0033744 | CG12370   | 12370 |
| FBgn0031161 | CG15445           | 15445 | FBgn0015527 | pen       | 1685  |
| FBgn0259482 | Mob3              | 4946  | FBgn0031851 | CG11188   | 11188 |
| FBgn0015737 | Hmu               | 3373  | FBgn0036511 | CG6498    | 6498  |
| FBgn0038818 | Nep4              | 4058  | FBgn0026787 | Nhe1      | 12178 |
| FBgn0036615 | CG4933            | 4933  | FBgn0032790 | CG10194   | 10194 |
| FBgn0039280 | Mocs2             | 10238 | FBgn0038397 | CG10185   | 10185 |
| FBgn0035335 | mRpL23            | 1320  | FBgn0031682 | CG5828    | 5828  |
| FBgn0033571 | Rpb5              | 11979 | FBgn0260990 | yata      | 1973  |
| FBgn0000109 | Aprt              | 18315 | FBgn0010504 | kermit    | 11546 |
| FBgn0014366 | noi               | 2925  | FBgn0033209 | CG12107   | 12107 |
| FBgn0027493 | CG17273           | 17273 | FBgn0034372 | Gint3     | 5469  |
| FBgn0261593 | RpS10b            | 14206 | FBgn0260441 | RpS12     | 11271 |
| FBgn0011327 | Uch-L3            | 3431  | FBgn0002791 | mr        | 3060  |
| FBgn0019936 | RpS20             | 15693 | FBgn0038321 | CG6218    | 6218  |
| FBgn0030364 | CG15735           | 15735 | FBgn0004838 | Hrb27C    | 10377 |
| FBgn0029105 | alpha-catenin-rel | 2987  | FBgn0022786 | Hira      | 12153 |
| FBgn0040628 | CG18672           | 18672 | FBgn0003137 | Ppn       | 33103 |
| FBgn0010399 | Nmdar1            | 2902  | FBgn0015770 | MstProx   | 1149  |
| FBgn0035164 | CG13901           | 13901 | FBgn0030482 | CG1673    | 1673  |
| FBgn0030669 | CG9240            | 9240  | FBgn0051251 | CG31251   | 31251 |
| FBgn0029801 | CG15771           | 15771 | FBgn0029134 | Prosbeta5 | 12323 |
| FBgn0031061 | CG14232           | 14232 | FBgn0035146 | CG13893   | 13893 |
| FBgn0037153 | olf413            | 12673 | FBgn0033203 | CG2070    | 2070  |
| FBgn0260743 | CG18347           | 18347 | FBgn0030480 | Tim9a     | 1660  |
| FBgn0032816 | Nf-YB             | 10447 | FBgn0037359 | MED27     | 1245  |
| FBgn0036219 | CG14127           | 14127 | FBgn0031636 | CG12194   | 12194 |
| FBgn0031753 | CG13999           | 13999 | FBgn0033710 | CG17739   | 17739 |
| FBgn0035638 | Tektin-C          | 10541 | FBgn0035588 | CG10672   | 10672 |
| FBgn0035228 | CG12091           | 12091 | FBgn0036028 | CG16717   | 16717 |
| FBgn0039092 | CG16723           | 16723 | FBgn0016697 | Prosalph5 | 10938 |
| FBgn0050423 | CG30423           | 30423 | FBgn0037683 | CG18473   | 18473 |
| FBgn0034389 | Mctp              | 15078 | FBgn0037466 | CG1965    | 1965  |
| FBgn0030109 | CG12121           | 12121 | FBgn0040696 | CG18675   | 18675 |
| FBgn0014869 | Pglym78           | 1721  | FBgn0031601 | Dim1      | 3058  |
| FBgn0039920 | CG11360           | 11360 | FBgn0033054 | CG14591   | 14591 |
| FBgn0263076 | Klp54D            | 15844 | FBgn0032465 | CG12404   | 12404 |
| FBgn0039052 | CG6733            | 6733  | FBgn0031604 | Elp3      | 15433 |
| FBgn0034052 | CG8299            | 8299  | FBgn0011774 | Irbp      | 5247  |

|             |              |       |             |          |       |
|-------------|--------------|-------|-------------|----------|-------|
| FBgn0036514 | CG12301      | 12301 | FBgn0037478 | CG2656   | 2656  |
| FBgn0000043 | Act42A       | 12051 | FBgn0031068 | Alr      | 12534 |
| FBgn0031119 | CG1812       | 1812  | FBgn0033457 | CG1675   | 1675  |
| FBgn0263234 | Phae1        | 16996 | FBgn0034876 | wmd      | 3957  |
| FBgn0027788 | Hey          | 11194 | FBgn0038541 | TyrRII   | 16766 |
| FBgn0053094 | Synd         | 33094 | FBgn0039854 | CG1635   | 1635  |
| FBgn0039770 | CG15537      | 15537 | FBgn0010774 | Aly      | 1101  |
| FBgn0050410 | CG30410      | 30410 | FBgn0035432 | ZnT63C   | 17723 |
| FBgn0039668 | Trc8         | 2304  | FBgn0034792 | CG3499   | 3499  |
| FBgn0086785 | Vps36        | 10711 | FBgn0037050 | CG10566  | 10566 |
| FBgn0040705 | CG15434      | 15434 | FBgn0036847 | CG11577  | 11577 |
| FBgn0025608 | Faf          | 10372 | FBgn0020378 | Sp1      | 1343  |
| FBgn0037517 | CG10086      | 10086 | FBgn0037299 | CG1115   | 1115  |
| FBgn0039274 | CG11920      | 11920 | FBgn0024196 | robl     | 10751 |
| FBgn0031359 | CG18317      | 18317 | FBgn0023527 | CG3071   | 3071  |
| FBgn0004435 | Galpha49B    | 17759 | FBgn0023528 | CG2924   | 2924  |
| FBgn0037898 | CG18643      | 18643 | FBgn0034372 | Gint3    | 5469  |
| FBgn0037643 | skap         | 11963 | FBgn0035149 | MED30    | 17183 |
| FBgn0035500 | ens          | 14998 | FBgn0050290 | Ppcdc    | 30290 |
| FBgn0050441 | CG30441      | 30441 | FBgn0037293 | CG12007  | 12007 |
| FBgn0035265 | CG18173      | 18173 | FBgn0025111 | Ant2     | 1683  |
| FBgn0030576 | CG15890      | 15890 | FBgn0033401 | CG1968   | 1968  |
| FBgn0051005 | qlless       | 31005 | FBgn0035398 | Cht7     | 1869  |
| FBgn0261535 | l(2)34Fd     | 7516  | FBgn0015829 | TfIIbeta | 1276  |
| FBgn0033468 | CG1418       | 1418  | FBgn0034141 | CG8311   | 8311  |
| FBgn0052483 | CG32483      | 32483 | FBgn0030053 | CG12081  | 12081 |
| FBgn0032643 | CG6453       | 6453  | FBgn0050194 | CG30194  | 30194 |
| FBgn0043575 | PGRP-SC2     | 14745 | FBgn0036771 | CG14353  | 14353 |
| FBgn0261592 | RpS6         | 10944 | FBgn0036353 | CG10171  | 10171 |
| FBgn0027334 | l(1)G0004    | 11738 | FBgn0038136 | CG8774   | 8774  |
| FBgn0040268 | Top3alpha    | 10123 | FBgn0035404 | CG12079  | 12079 |
| FBgn0023506 | Es2          | 1474  | FBgn0019928 | Ser8     | 4812  |
| FBgn0034763 | RYBP         | 12190 | FBgn0261986 | RASSF8   | 5053  |
| FBgn0037121 | Rpb8         | 11246 | FBgn0014395 | tilB     | 14620 |
| FBgn0028919 | CG16865      | 16865 | FBgn0024308 | Smr      | 4013  |
| FBgn0032961 | CG1416       | 1416  | FBgn0038660 | CG14291  | 14291 |
| FBgn0001612 | l(1)dd4      | 10988 | FBgn0038892 | CG15498  | 15498 |
| FBgn0001105 | Gbeta13F     | 10545 | FBgn0261938 | mtRNApol | 4644  |
| FBgn0013813 | Dhc98D       | 1842  | FBgn0032750 | CG10495  | 10495 |
| FBgn0042102 | CG18745      | 18745 | FBgn0037655 | CG11984  | 11984 |
| FBgn0027090 | Aats-gln     | 10506 | FBgn0031250 | Ent1     | 11907 |
| FBgn0000557 | Ef1alpha100E | 1873  | FBgn0032700 | CG10338  | 10338 |
| FBgn0050345 | CG30345      | 30345 | FBgn0037529 | mRpS9    | 2957  |
| FBgn0028421 | Kap3         | 11759 | FBgn0259784 | Det      | 12265 |
| FBgn0028554 | xl6          | 10203 | FBgn0034884 | CG17662  | 17662 |
| FBgn0032329 | Art8         | 16840 | FBgn0261608 | RpL37A   | 5827  |
| FBgn0261609 | eIF-2alpha   | 9946  | FBgn0003863 | alphaTry | 18444 |
| FBgn0037469 | Dpck         | 1939  | FBgn0031298 | Atg4     | 4428  |
| FBgn0034784 | CG9826       | 9826  | FBgn0035145 | MED14    | 12031 |
| FBgn0051159 | EF-G2        | 31159 | FBgn0032172 | CG5850   | 5850  |
| FBgn0010220 | Dbp45A       | 12759 | FBgn0031032 | CG14204  | 14204 |

|             |            |       |             |               |       |
|-------------|------------|-------|-------------|---------------|-------|
| FBgn0031114 | cactin     | 1676  | FBgn0032597 | CG17904       | 17904 |
| FBgn0038499 | Brf        | 31256 | FBgn0033233 | Kdm4A         | 15835 |
| FBgn0261596 | RpS24      | 3751  | FBgn0037439 | CG10286       | 10286 |
| FBgn0051155 | Rpb7       | 31155 | FBgn0086443 | Aats-asn      | 10687 |
| FBgn0031252 | CG13690    | 13690 | FBgn0038426 | mRpS33        | 10406 |
| FBgn0022153 | l(2)k05819 | 3054  | FBgn0035724 | CG10064       | 10064 |
| FBgn0050491 | CG30491    | 30491 | FBgn0086691 | UK114         | 15261 |
| FBgn0023174 | Prosbeta2  | 3329  | FBgn0035154 | CG33344       | 3344  |
| FBgn0010501 | Dcp-1      | 5370  | FBgn0038037 | Cyp9f2        | 11466 |
| FBgn0032447 | PICK1      | 6167  | FBgn0035586 | CG10671       | 10671 |
| FBgn0032800 | CG10137    | 10137 | FBgn0051064 | CG31064       | 31064 |
| FBgn0029715 | CG11444    | 11444 | FBgn0035437 | CG11526       | 11526 |
| FBgn0038919 | CG17843    | 17843 | FBgn0037255 | Fip1          | 1078  |
| FBgn0030507 | CG11164    | 11164 | FBgn0019830 | colt          | 3057  |
| FBgn0030252 | Myo10A     | 2174  | FBgn0031607 | CG15440       | 15440 |
| FBgn0035540 | Syx17      | 7452  | FBgn0025286 | RpL31         | 1821  |
| FBgn0035124 | ttn2       | 12313 | FBgn0034709 | CG3074        | 3074  |
| FBgn0035965 | Use1       | 14181 | FBgn0037580 | DppIII        | 7415  |
| FBgn0037657 | hyx        | 11990 | FBgn0031064 | CG12531       | 12531 |
| FBgn0053198 | pen-2      | 33198 | FBgn0035256 | CG13930       | 13930 |
| FBgn0039258 | beta4GalT7 | 11780 | FBgn0032522 | CG16848       | 16848 |
| FBgn0262473 | Tl         | 5490  | FBgn0039859 | CG11539       | 11539 |
| FBgn0027084 | Aats-lys   | 12141 | FBgn0026411 | Lim1          | 11354 |
| FBgn0033058 | CCHa2r     | 14593 | FBgn0032754 | CG10700       | 10700 |
| FBgn0035538 | DopEcR     | 18314 | FBgn0025743 | mbt           | 18582 |
| FBgn0029818 | CG3033     | 3033  | FBgn0028577 | pUf68         | 12085 |
| FBgn0033362 | CG8172     | 8172  | FBgn0037440 | CG1041        | 1041  |
| FBgn0027535 | botv       | 15110 | FBgn0030406 | CG1463        | 1463  |
| FBgn0039690 | CG1969     | 1969  | FBgn0035610 | Lkr           | 10626 |
| FBgn0020653 | Trxr-1     | 2151  | FBgn0035799 | CG14838       | 14838 |
| FBgn0032143 | CG4017     | 4017  | FBgn0027291 | l(1)G0156     | 12233 |
| FBgn0037712 | CG16789    | 16789 | FBgn0035674 | CG13295       | 13295 |
| FBgn0024362 | CG11412    | 11412 | FBgn0036030 | CG6767        | 6767  |
| FBgn0039626 | Slu7       | 1420  | FBgn0027499 | wde           | 12340 |
| FBgn0037022 | CG11396    | 11396 | FBgn0035677 | CG13293       | 13293 |
| FBgn0035534 | mRpS6      | 15016 | FBgn0035375 | pgant6        | 2103  |
| FBgn0030460 | CG2453     | 2453  | FBgn0024329 | Mekk1         | 7717  |
| FBgn0035308 | CG15822    | 15822 | FBgn0032819 | CG10463       | 10463 |
| FBgn0025777 | homer      | 11324 | FBgn0035231 | Cct2          | 18330 |
| FBgn0034605 | CG15661    | 15661 | FBgn0032247 | CG5188        | 5188  |
| FBgn0030545 | CG11590    | 11590 | FBgn0039150 | CG13605       | 13605 |
| FBgn0261575 | tobi       | 11909 | FBgn0000337 | cn            | 1555  |
| FBgn0031062 | CG14230    | 14230 | FBgn0033225 | CG1550        | 1550  |
| FBgn0086698 | frtz       | 17657 | FBgn0032956 | Cul-2         | 1512  |
| FBgn0050392 | CG30392    | 30392 | FBgn0039049 | CG6726        | 6726  |
| FBgn0035540 | Syx17      | 7452  | FBgn0039674 | CG1907        | 1907  |
| FBgn0039112 | CG10219    | 10219 | FBgn0020238 | 14-3-3epsilon | 31196 |
| FBgn0035540 | Syx17      | 7452  | FBgn0028331 | l(1)G0289     | 2221  |
| FBgn0263026 | CG43321    | 13776 | FBgn0039576 | CG17856       | 17856 |
| FBgn0011832 | Ser12      | 17240 | FBgn0033214 | CG1941        | 1941  |
| FBgn0001122 | G-alpha47A | 2204  | FBgn0035592 | CG10674       | 10674 |

|             |              |       |             |           |       |
|-------------|--------------|-------|-------------|-----------|-------|
| FBgn0036194 | CG11652      | 11652 | FBgn0051320 | CG31320   | 31320 |
| FBgn0034521 | Mgat1        | 13431 | FBgn0050429 | CG30429   | 30429 |
| FBgn0034703 | CG3045       | 3045  | FBgn0031217 | CG11377   | 11377 |
| FBgn0029980 | CG10778      | 10778 | FBgn0030067 | Rbm13     | 10648 |
| FBgn0023180 | Orc6         | 1584  | FBgn0035423 | CG17737   | 17737 |
| FBgn0015519 | nAcRalpha-7E | 2302  | FBgn0034242 | CG14480   | 14480 |
| FBgn0031494 | CG17219      | 17219 | FBgn0014427 | CG11899   | 11899 |
| FBgn0036128 | Elo68beta    | 11801 | FBgn0039210 | CG13625   | 13625 |
| FBgn0261872 | scaf6        | 33522 | FBgn0086613 | Ino80     | 31212 |
| FBgn0038013 | CG10038      | 10038 | FBgn0032863 | cdc23     | 2508  |
| FBgn0035110 | thoc7        | 17143 | FBgn0032036 | CG13384   | 13384 |
| FBgn0051120 | CG31120      | 31120 | FBgn0051229 | CG31229   | 31229 |
| FBgn0039632 | Cul-5        | 1401  | FBgn0036538 | CG15715   | 15715 |
| FBgn0032051 | CG13097      | 13097 | FBgn0034454 | CG15120   | 15120 |
| FBgn0032811 | CG10268      | 10268 | FBgn0026873 | MED18     | 14802 |
| FBgn0030873 | CG15814      | 15814 | FBgn0030694 | CG15602   | 15602 |
| FBgn0031700 | CG14022      | 14022 | FBgn0052451 | SPoCk     | 32451 |
| FBgn0030087 | CG7766       | 7766  | FBgn0038342 | CG14870   | 14870 |
| FBgn0030468 | CG1622       | 1622  | FBgn0025712 | CG13920   | 13920 |
| FBgn0040038 | klhl10       | 12423 | FBgn0037301 | Mms19     | 12005 |
| FBgn0042175 | CG18858      | 18858 | FBgn0031036 | CG14220   | 14220 |
| FBgn0030099 | CG12056      | 12056 | FBgn0261934 | dikar     | 32393 |
| FBgn0039664 | CG2006       | 2006  | FBgn0039829 | CG15561   | 15561 |
| FBgn0030584 | CG14407      | 14407 | FBgn0051156 | CG31156   | 31156 |
| FBgn0250843 | Pros35       | 4904  | FBgn0035147 | Gale      | 12030 |
| FBgn0031850 | Tsp          | 11326 | FBgn0030330 | Tango10   | 1841  |
| FBgn0033842 | cbc          | 5970  | FBgn0036264 | CG11529   | 11529 |
| FBgn0026319 | Traf4        | 3048  | FBgn0031633 | CG2976    | 2976  |
| FBgn0031145 | Ntf-2        | 1740  | FBgn0029942 | CG2059    | 2059  |
| FBgn0024509 | sec13        | 6773  | FBgn0000046 | Act87E    | 18290 |
| FBgn0033653 | CG13192      | 13192 | FBgn0034793 | asrij     | 13533 |
| FBgn0035243 | CG13926      | 13926 | FBgn0042186 | CG17239   | 17239 |
| FBgn0033521 | CG12896      | 12896 | FBgn0039932 | CG11093   | 11093 |
| FBgn0036059 | nudE         | 8104  | FBgn0031040 | CG14210   | 14210 |
| FBgn0029176 | Ef1gamma     | 11901 | FBgn0028398 | Taf10     | 2859  |
| FBgn0030556 | mRNA-cap     | 1810  | FBgn0001147 | gsb-n     | 2692  |
| FBgn0261789 | SmD2         | 1249  | FBgn0033020 | CG10396   | 10396 |
| FBgn0037339 | Pi4KIIalpha  | 2929  | FBgn0030558 | CG1461    | 1461  |
| FBgn0032793 | CG10189      | 10189 | FBgn0036341 | Syx13     | 11278 |
| FBgn0085484 | CG34455      | 34455 | FBgn0022361 | Pur-alpha | 1507  |
| FBgn0000078 | Amy-d        | 17876 | FBgn0000117 | arm       | 11579 |
| FBgn0050361 | mtt          | 30361 | FBgn0031050 | Arp11     | 12235 |
| FBgn0036564 | Taspase1     | 5241  | FBgn0031596 | CG15429   | 15429 |
| FBgn0024364 | CG11417      | 11417 | FBgn0039889 | CG2219    | 2219  |
| FBgn0027654 | jdp          | 2239  | FBgn0035422 | RpL28     | 12740 |
| FBgn0025635 | CG17829      | 17829 | FBgn0034816 | CG3085    | 3085  |
| FBgn0035438 | PHGPx        | 12013 | FBgn0035356 | CG16986   | 16986 |
| FBgn0039636 | CG11877      | 11877 | FBgn0250753 | exba      | 2922  |
| FBgn0033555 | RpS15Ab      | 12324 | FBgn0037351 | RpL13A    | 1475  |
| FBgn0013973 | Gycbeta100B  | 1470  | FBgn0027055 | CSN3      | 18332 |
| FBgn0004244 | Rdl          | 10537 | FBgn0037644 | CG11964   | 11964 |

|             |           |       |             |           |       |
|-------------|-----------|-------|-------------|-----------|-------|
| FBgn0036204 | Tim13     | 11611 | FBgn0028695 | Rpn1      | 7762  |
| FBgn0261383 | CG3125    | 3125  | FBgn0050493 | CG30493   | 30493 |
| FBgn0024558 | Dph5      | 31289 | FBgn0262603 | sec8      | 2095  |
| FBgn0004428 | LysE      | 1180  | FBgn0039635 | CG11876   | 11876 |
| FBgn0035709 | eIF4E-4   | 10124 | FBgn0019947 | Psn       | 18803 |
| FBgn0025381 | CG14782   | 14782 | FBgn0038271 | CG3731    | 3731  |
| FBgn0051092 | LpR2      | 31092 | FBgn0039802 | dj-1beta  | 1349  |
| FBgn0260462 | CG12163   | 12163 | FBgn0033686 | Hen1      | 12367 |
| FBgn0052627 | NnaD      | 32627 | FBgn0036984 | CG13248   | 13248 |
| FBgn0033518 | Prx2540-2 | 11765 | FBgn0037512 | CG2616    | 2616  |
| FBgn0011584 | Trp1      | 4758  | FBgn0037534 | CG2781    | 2781  |
| FBgn0011584 | Trp1      | 4758  | FBgn0033205 | CG2064    | 2064  |
| FBgn0029819 | CG3016    | 3016  | FBgn0004390 | Gap1      | 6721  |
| FBgn0016672 | Ipp       | 3028  | FBgn0033155 | Br140     | 1845  |
| FBgn0037647 | RagA      | 11968 | FBgn0039836 | CG1750    | 1750  |
| FBgn0030555 | Fbx14     | 1839  | FBgn0086710 | RpL30     | 10652 |
| FBgn0011754 | PhKgamma  | 1830  | FBgn0039863 | CG1815    | 1815  |
| FBgn0031995 | CG8475    | 8475  | FBgn0010053 | Jheh1     | 15101 |
| FBgn0029133 | REG       | 1591  | FBgn0011202 | dia       | 1768  |
| FBgn0020389 | Papss     | 8363  | FBgn0083919 | Zasp52    | 30084 |
| FBgn0027791 | O-fut2    | 14789 | FBgn0243513 | cnir      | 17262 |
| FBgn0011290 | Taf12     | 17358 | FBgn0029672 | CG2875    | 2875  |
| FBgn0031877 | CG10399   | 10399 | FBgn0038856 | sec15     | 7034  |
| FBgn0020762 | Atet      | 2969  | FBgn0037276 | CG17387   | 17387 |
| FBgn0030239 | CG17333   | 17333 | FBgn0031929 | CG18585   | 18585 |
| FBgn0031189 | CG14618   | 14618 | FBgn0262350 | bru-3     | 12478 |
| FBgn0033274 | CG14757   | 14757 | FBgn0024509 | sec13     | 6773  |
| FBgn0061198 | HSPC300   | 30173 | FBgn0037467 | CG1104    | 1104  |
| FBgn0017566 | ND75      | 2286  | FBgn0030305 | CG1749    | 1749  |
| FBgn0036292 | CG10646   | 10646 | FBgn0016038 | mod(r)    | 17828 |
| FBgn0030343 | ATP7      | 1886  | FBgn0039877 | CG2118    | 2118  |
| FBgn0003559 | su(f)     | 17170 | FBgn0004425 | LysB      | 1179  |
| FBgn0011277 | HLH4C     | 3052  | FBgn0025615 | torp4a    | 3024  |
| FBgn0001269 | inv       | 17835 | FBgn0011661 | Moe       | 10701 |
| FBgn0026380 | Prosbeta3 | 11981 | FBgn0010215 | alpha-Cat | 17947 |
| FBgn0033716 | Den1      | 8493  | FBgn0037377 | CG1218    | 1218  |
| FBgn0035515 | CG14997   | 14997 | FBgn0037377 | CG1218    | 1218  |
| FBgn0037313 | CG1161    | 1161  | FBgn0004390 | Gap1      | 6721  |
| FBgn0035533 | Cip4      | 15015 | FBgn0034963 | CG13567   | 13567 |
| FBgn0039271 | CG11839   | 11839 | FBgn0030038 | CG1440    | 1440  |
| FBgn0034417 | CG15117   | 15117 | FBgn0032850 | Kua       | 10723 |
| FBgn0028686 | Rpt3      | 16916 | FBgn0033339 | sec31     | 8266  |
| FBgn0011555 | thetaTry  | 12385 | FBgn0045064 | bwa       | 13969 |
| FBgn0005631 | robo      | 13521 | FBgn0020272 | mst       | 1424  |
| FBgn0032387 | CG16965   | 16965 | FBgn0033520 | Prx2540-1 | 12405 |
| FBgn0035415 | CG14966   | 14966 | FBgn0040534 | CG11985   | 11985 |
| FBgn0024994 | Csat      | 2675  | FBgn0010551 | l(2)03709 | 15081 |
| FBgn0037358 | elm       | 2185  | FBgn0038827 | Fancd2    | 17269 |
| FBgn0036196 | CG11658   | 11658 | FBgn0035173 | CG13907   | 13907 |
| FBgn0033479 | CG2292    | 2292  | FBgn0259998 | CG17571   | 17571 |
| FBgn0033264 | Nup50     | 2158  | FBgn0261439 | SdhA      | 17246 |

|             |           |       |             |            |       |
|-------------|-----------|-------|-------------|------------|-------|
| FBgn0031266 | CG2807    | 2807  | FBgn0004430 | LysS       | 1165  |
| FBgn0051314 | Neu3      | 7649  | FBgn0030947 | CG6696     | 6696  |
| FBgn0042135 | CG18812   | 18812 | FBgn0032680 | Ntf-2r     | 10174 |
| FBgn0037046 | CG10581   | 10581 | FBgn0024980 | Syx4       | 2715  |
| FBgn0262743 | Fs(2)Ket  | 2637  | FBgn0030142 | CG3004     | 3004  |
| FBgn0035722 | CG10075   | 10075 | FBgn0001276 | ix         | 13201 |
| FBgn0039773 | CG2224    | 2224  | FBgn0260985 | RfC4       | 14999 |
| FBgn0000422 | Ddc       | 10697 | FBgn0037989 | CG14741    | 14741 |
| FBgn0039557 | CG12259   | 12259 | FBgn0005561 | sv         | 11049 |
| FBgn0038170 | CG14367   | 14367 | FBgn0032095 | Toll-4     | 18241 |
| FBgn0261675 | Npc1b     | 11233 | FBgn0036643 | Syx8       | 4109  |
| FBgn0261955 | kdn       | 3861  | FBgn0085449 | CG34420    | 34420 |
| FBgn0039640 | CG14516   | 14516 | FBgn0051116 | CIC-a      | 31116 |
| FBgn0036340 | SRm160    | 11274 | FBgn0259481 | Mob2       | 11711 |
| FBgn0038432 | CG14883   | 14883 | FBgn0086357 | Sec61alpha | 9539  |
| FBgn0027903 | CG12018   | 12018 | FBgn0035400 | CG11537    | 11537 |
| FBgn0024188 | san       | 12352 | FBgn0034367 | sec6       | 5341  |
| FBgn0003742 | tra2      | 10128 | FBgn0033365 | CG8170     | 8170  |
| FBgn0030400 | CG11138   | 11138 | FBgn0038053 | CG18549    | 18549 |
| FBgn0027951 | MTA1-like | 2244  | FBgn0040308 | Jafrac2    | 1274  |
| FBgn0024698 | Cpsf160   | 10110 | FBgn0028467 | CG11070    | 11070 |
| FBgn0039623 | CG1951    | 1951  | FBgn0035435 | CG12077    | 12077 |
|             |           |       | FBgn0030061 | CG1785     | 1785  |
